# Supplementary material for: Substituent Effects in Tetrel Bonds Involving Aromatic Silane Derivatives: An ab initio Study
Source: MDPI journal article supplement (doi:10.3390/molecules28052385), 2023-03-05
Supplement: s1 [file s1]

# Substituent Effects in Tetrel Bonds Involving Aromatic Silane Derivatives: An *ab initio* Study

Sergi Burguera, Antonio Frontera and Antonio Bauzá \*

Department of Chemistry, Universitat de les Illes Balears, Ctra. de Valldemossa km 7.5, 07122 Palma de Mallorca, Balears, Spain

\* Correspondence: antonio.bauza@uib.es

## Electronic Supplementary Information

### Index

|                                                      |         |
|------------------------------------------------------|---------|
| Cartesian coordinates of complexes 1 to 72           | page 2  |
| Cartesian coordinates of the selected CSD structures | page 30 |

## Cartesian coordinates of complexes 1 to 72

1.

|    |             |             |             |
|----|-------------|-------------|-------------|
| N  | 0.18440970  | -4.31102840 | 0.00000000  |
| C  | 0.05755240  | -5.47476450 | 0.00000000  |
| N  | -0.01602690 | -6.81961140 | 0.00000000  |
| H  | -0.42961540 | -7.20095420 | 0.84014280  |
| H  | -0.42961540 | -7.20095420 | -0.84014280 |
| Si | 0.13037350  | -1.15213430 | 0.00000000  |
| F  | -0.60481300 | -1.67840710 | 1.28700780  |
| F  | -0.60481300 | -1.67840710 | -1.28700780 |
| F  | 1.63275850  | -1.62173110 | 0.00000000  |
| C  | 0.08180360  | 0.70350700  | 0.00000000  |
| C  | 0.07289630  | 1.44485340  | -1.18085610 |
| C  | 0.07289630  | 1.44485340  | 1.18085610  |
| C  | 0.04055320  | 2.82790990  | -1.18704140 |
| C  | 0.04055320  | 2.82790990  | 1.18704140  |
| C  | 0.01682700  | 3.55900850  | 0.00000000  |
| F  | 0.02069860  | 3.50272730  | -2.34630550 |
| F  | 0.02069860  | 3.50272730  | 2.34630550  |
| F  | 0.10652680  | 0.82146900  | -2.36591260 |
| F  | 0.10652680  | 0.82146900  | 2.36591260  |
| N  | 0.05422340  | 4.93585500  | 0.00000000  |
| H  | -0.27720710 | 5.37285130  | -0.84719830 |
| H  | -0.27720710 | 5.37285130  | 0.84719830  |

2.

|    |             |             |             |
|----|-------------|-------------|-------------|
| N  | 0.16086930  | -4.77791980 | 0.00000000  |
| C  | 0.04989660  | -5.94315880 | 0.00000000  |
| N  | -0.00504090 | -7.28822380 | 0.00000000  |
| H  | -0.41073210 | -7.67687920 | 0.84058150  |
| H  | -0.41073210 | -7.67687920 | -0.84058150 |
| Si | 0.24014460  | -1.66522060 | 0.00000000  |
| F  | -0.52266390 | -2.14520280 | 1.28769710  |
| F  | -0.52266390 | -2.14520280 | -1.28769710 |
| F  | 1.72175920  | -2.19342970 | 0.00000000  |
| C  | 0.28534330  | 0.19746510  | 0.00000000  |
| C  | 0.31577220  | 0.93082930  | -1.18474940 |
| C  | 0.31577220  | 0.93082930  | 1.18474940  |
| C  | 0.34784190  | 2.31795290  | -1.19666790 |
| C  | 0.34784190  | 2.31795290  | 1.19666790  |
| C  | 0.36894020  | 3.03448340  | 0.00000000  |
| F  | 0.36351920  | 2.97852340  | -2.35303660 |
| F  | 0.36351920  | 2.97852340  | 2.35303660  |
| F  | 0.32175000  | 0.29875050  | -2.36445560 |
| F  | 0.32175000  | 0.29875050  | 2.36445560  |
| O  | 0.46499900  | 4.38418380  | 0.00000000  |
| C  | -0.79719830 | 5.07739290  | 0.00000000  |
| H  | -0.84705150 | 5.69866760  | 0.89321940  |
| H  | -0.84705150 | 5.69866760  | -0.89321940 |
| H  | -1.62658450 | 4.36914410  | 0.00000000  |

3.

|    |             |             |             |
|----|-------------|-------------|-------------|
| N  | 0.15072110  | -4.52718410 | 0.00000000  |
| C  | 0.03704490  | -5.69217750 | 0.00000000  |
| N  | -0.02109790 | -7.03722430 | 0.00000000  |
| H  | -0.42846220 | -7.42444900 | 0.84046130  |
| H  | -0.42846220 | -7.42444900 | -0.84046130 |
| Si | 0.09621600  | -1.40912040 | 0.00000000  |
| F  | -0.64358220 | -1.92448310 | 1.28753740  |
| F  | -0.64358220 | -1.92448310 | -1.28753740 |

|   |             |             |             |
|---|-------------|-------------|-------------|
| F | 1.60038110  | -1.86992330 | 0.00000000  |
| C | 0.05727290  | 0.45338130  | 0.00000000  |
| C | 0.05566620  | 1.18974870  | -1.18252430 |
| C | 0.05566620  | 1.18974870  | 1.18252430  |
| C | 0.02350280  | 2.57720810  | -1.18311350 |
| C | 0.02350280  | 2.57720810  | 1.18311350  |
| C | 0.01070420  | 3.30774970  | 0.00000000  |
| F | 0.01548210  | 3.22396460  | -2.35458620 |
| F | 0.01548210  | 3.22396460  | 2.35458620  |
| F | 0.09242360  | 0.56157420  | -2.36393390 |
| F | 0.09242360  | 0.56157420  | 2.36393390  |
| C | -0.02766530 | 4.80531030  | 0.00000000  |
| H | -1.06020900 | 5.16182320  | 0.00000000  |
| H | 0.46328560  | 5.20011910  | 0.88767530  |
| H | 0.46328560  | 5.20011910  | -0.88767530 |

#### 4.

|    |             |             |             |
|----|-------------|-------------|-------------|
| N  | 0.13653660  | -3.70736390 | 0.00000000  |
| C  | 0.04481850  | -4.87422060 | 0.00000000  |
| N  | 0.01228900  | -6.21978150 | 0.00000000  |
| H  | -0.38638950 | -6.61545840 | 0.84066980  |
| H  | -0.38638950 | -6.61545840 | -0.84066980 |
| Si | 0.07617480  | -0.61300820 | 0.00000000  |
| F  | -0.66495480 | -1.12330820 | 1.28811990  |
| F  | -0.66495480 | -1.12330820 | -1.28811990 |
| F  | 1.58194470  | -1.06686440 | 0.00000000  |
| C  | 0.03904740  | 1.25288180  | 0.00000000  |
| C  | 0.03781160  | 1.98351850  | -1.18712850 |
| C  | 0.03781160  | 1.98351850  | 1.18712850  |
| C  | 0.00844820  | 3.37225360  | -1.19076900 |
| C  | 0.00844820  | 3.37225360  | 1.19076900  |
| C  | -0.00844430 | 4.07834590  | 0.00000000  |
| F  | 0.00300510  | 4.02725880  | -2.35418920 |
| F  | 0.00300510  | 4.02725880  | 2.35418920  |
| F  | 0.07511950  | 1.35037130  | -2.36423260 |
| F  | 0.07511950  | 1.35037130  | 2.36423260  |
| H  | -0.02844690 | 5.16074000  | 0.00000000  |

#### 5.

|    |             |             |             |
|----|-------------|-------------|-------------|
| N  | 0.07796360  | -4.47587390 | 0.00000000  |
| C  | 0.01793170  | -5.64459480 | 0.00000000  |
| N  | 0.02232240  | -6.98953650 | 0.00000000  |
| H  | -0.36164050 | -7.39810170 | 0.84129270  |
| H  | -0.36164050 | -7.39810170 | -0.84129270 |
| Si | 0.04960420  | -1.44593670 | 0.00000000  |
| F  | -0.69986600 | -1.93107050 | 1.29155940  |
| F  | -0.69986600 | -1.93107050 | -1.29155940 |
| F  | 1.55346650  | -1.90215570 | 0.00000000  |
| C  | 0.03819000  | 0.42550930  | 0.00000000  |
| C  | 0.04405060  | 1.16124270  | -1.18101370 |
| C  | 0.04405060  | 1.16124270  | 1.18101370  |
| C  | 0.03248450  | 2.55054660  | -1.19388200 |
| C  | 0.03248450  | 2.55054660  | 1.19388200  |
| C  | 0.04919660  | 3.27226640  | 0.00000000  |
| F  | -0.00110080 | 3.16681140  | -2.37159480 |
| F  | -0.00110080 | 3.16681140  | 2.37159480  |
| F  | 0.06069220  | 0.53576850  | -2.35969440 |
| F  | 0.06069220  | 0.53576850  | 2.35969440  |
| C  | 0.02226510  | 4.78260140  | 0.00000000  |
| F  | 0.63110990  | 5.28901650  | -1.07307730 |
| F  | 0.63110990  | 5.28901650  | 1.07307730  |

|    |             |             |             |
|----|-------------|-------------|-------------|
| F  | -1.24239980 | 5.22929330  | 0.00000000  |
| 6. |             |             |             |
| N  | 0.06761470  | -3.98048640 | 0.00000000  |
| C  | 0.02282070  | -5.14982310 | 0.00000000  |
| N  | 0.04481950  | -6.49416150 | 0.00000000  |
| H  | -0.33209470 | -6.90861510 | 0.84156980  |
| H  | -0.33209470 | -6.90861510 | -0.84156980 |
| Si | 0.03873540  | -0.97397900 | 0.00000000  |
| F  | -0.71200250 | -1.45314560 | 1.29265600  |
| F  | -0.71200250 | -1.45314560 | -1.29265600 |
| F  | 1.54382220  | -1.42534510 | 0.00000000  |
| C  | 0.02765020  | 0.89985630  | 0.00000000  |
| C  | 0.03711290  | 1.63030880  | -1.18748070 |
| C  | 0.03711290  | 1.63030880  | 1.18748070  |
| C  | 0.02559200  | 3.01783330  | -1.20113690 |
| C  | 0.02559200  | 3.01783330  | 1.20113690  |
| C  | 0.01782800  | 3.72869960  | 0.00000000  |
| F  | 0.02904970  | 3.67297020  | -2.35567470 |
| F  | 0.02904970  | 3.67297020  | 2.35567470  |
| F  | 0.06660950  | 0.99959710  | -2.36184810 |
| F  | 0.06660950  | 0.99959710  | 2.36184810  |
| C  | 0.00821790  | 5.15239570  | 0.00000000  |
| N  | -0.00004230 | 6.32494610  | 0.00000000  |
| 7. |             |             |             |
| N  | 0.79703080  | -3.68977150 | 0.00000000  |
| C  | 0.63891580  | -4.85253240 | 0.00000000  |
| O  | 0.49729030  | -6.13502210 | 0.00000000  |
| C  | -0.89418350 | -6.55493760 | 0.00000000  |
| H  | -0.86349750 | -7.63929200 | 0.00000000  |
| H  | -1.38635340 | -6.18065660 | 0.89576590  |
| H  | -1.38635340 | -6.18065660 | -0.89576590 |
| Si | 0.48958870  | -0.53146920 | 0.00000000  |
| F  | -0.20199870 | -1.12018190 | 1.28460430  |
| F  | -0.20199870 | -1.12018190 | -1.28460430 |
| F  | 2.02419400  | -0.87952470 | 0.00000000  |
| C  | 0.28834980  | 1.31297690  | 0.00000000  |
| C  | 0.21883740  | 2.05089750  | -1.18100430 |
| C  | 0.21883740  | 2.05089750  | 1.18100430  |
| C  | 0.07386480  | 3.42665380  | -1.18717200 |
| C  | 0.07386480  | 3.42665380  | 1.18717200  |
| C  | -0.00921320 | 4.15335770  | 0.00000000  |
| F  | -0.00107950 | 4.09761130  | -2.34630480 |
| F  | -0.00107950 | 4.09761130  | 2.34630480  |
| F  | 0.30287890  | 1.43178740  | -2.36573980 |
| F  | 0.30287890  | 1.43178740  | 2.36573980  |
| N  | -0.08406750 | 5.52835940  | 0.00000000  |
| H  | -0.44835350 | 5.93781650  | -0.84741500 |
| H  | -0.44835350 | 5.93781650  | 0.84741500  |
| 8. |             |             |             |
| N  | 0.71330890  | -4.17047660 | 0.00000000  |
| C  | 0.59681560  | -5.33805090 | 0.00000000  |
| O  | 0.50346430  | -6.62446250 | 0.00000000  |
| C  | -0.87044990 | -7.09958980 | 0.00000000  |
| H  | -0.79604660 | -8.18180650 | 0.00000000  |
| H  | -1.37710160 | -6.74555470 | 0.89587690  |
| H  | -1.37710160 | -6.74555470 | -0.89587690 |
| Si | 0.59432330  | -1.03069600 | 0.00000000  |
| F  | -0.13592040 | -1.56497150 | 1.28550120  |

|   |             |             |             |
|---|-------------|-------------|-------------|
| F | -0.13592040 | -1.56497150 | -1.28550120 |
| F | 2.10615440  | -1.46358700 | 0.00000000  |
| C | 0.50994980  | 0.82983670  | 0.00000000  |
| C | 0.48601540  | 1.56319830  | -1.18497990 |
| C | 0.48601540  | 1.56319830  | 1.18497990  |
| C | 0.41384520  | 2.94881330  | -1.19684480 |
| C | 0.41384520  | 2.94881330  | 1.19684480  |
| C | 0.38039930  | 3.66471380  | 0.00000000  |
| F | 0.37955290  | 3.60887460  | -2.35297970 |
| F | 0.37955290  | 3.60887460  | 2.35297970  |
| F | 0.53947980  | 0.93276870  | -2.36428130 |
| F | 0.53947980  | 0.93276870  | 2.36428130  |
| O | 0.37296090  | 5.01769300  | 0.00000000  |
| C | -0.93877540 | 5.61213160  | 0.00000000  |
| H | -1.03618780 | 6.22780690  | 0.89313320  |
| H | -1.03618780 | 6.22780690  | -0.89313320 |
| H | -1.71147160 | 4.84242290  | 0.00000000  |

9.

|    |             |             |             |
|----|-------------|-------------|-------------|
| N  | 0.67991560  | -3.90294920 | 0.00000000  |
| C  | 0.58618110  | -5.07252500 | 0.00000000  |
| O  | 0.51651020  | -6.36041410 | 0.00000000  |
| C  | -0.84913960 | -6.85895900 | 0.00000000  |
| H  | -0.75645590 | -7.93974250 | 0.00000000  |
| H  | -1.36157270 | -6.51332520 | 0.89587020  |
| H  | -1.36157270 | -6.51332520 | -0.89587020 |
| Si | 0.41185330  | -0.78253100 | 0.00000000  |
| F  | -0.29350790 | -1.34975750 | 1.28536820  |
| F  | -0.29350790 | -1.34975750 | -1.28536820 |
| F  | 1.94233750  | -1.14505540 | 0.00000000  |
| C  | 0.24852830  | 1.07243770  | 0.00000000  |
| C  | 0.19798760  | 1.80681780  | -1.18267460 |
| C  | 0.19798760  | 1.80681780  | 1.18267460  |
| C  | 0.07395900  | 3.18907920  | -1.18322110 |
| C  | 0.07395900  | 3.18907920  | 1.18322110  |
| C  | 0.01291260  | 3.91707290  | 0.00000000  |
| F  | 0.02292480  | 3.83384820  | -2.35458090 |
| F  | 0.02292480  | 3.83384820  | 2.35458090  |
| F  | 0.27595670  | 1.18195010  | -2.36376930 |
| F  | 0.27595670  | 1.18195010  | 2.36376930  |
| C  | -0.12444240 | 5.40880900  | 0.00000000  |
| H  | -1.17831740 | 5.69619610  | 0.00000000  |
| H  | 0.33931090  | 5.83521770  | 0.88767630  |
| H  | 0.33931090  | 5.83521770  | -0.88767630 |

10.

|    |             |             |             |
|----|-------------|-------------|-------------|
| N  | 0.59557830  | -3.06198460 | 0.00000000  |
| C  | 0.56337880  | -4.23477580 | 0.00000000  |
| O  | 0.56212160  | -5.52421920 | 0.00000000  |
| C  | -0.77495470 | -6.09551710 | 0.00000000  |
| H  | -0.62410670 | -7.16970210 | 0.00000000  |
| H  | -1.30507920 | -5.77794660 | 0.89593390  |
| H  | -1.30507920 | -5.77794660 | -0.89593390 |
| Si | 0.33746380  | 0.03569580  | 0.00000000  |
| F  | -0.37333080 | -0.52119210 | 1.28613370  |
| F  | -0.37333080 | -0.52119210 | -1.28613370 |
| F  | 1.86649720  | -0.33118550 | 0.00000000  |
| C  | 0.18958740  | 1.89536890  | 0.00000000  |
| C  | 0.14503740  | 2.62439610  | -1.18727310 |
| C  | 0.14503740  | 2.62439610  | 1.18727310  |
| C  | 0.03364410  | 4.00895850  | -1.19087190 |

|     |             |             |             |
|-----|-------------|-------------|-------------|
| C   | 0.03364410  | 4.00895850  | 1.19087190  |
| C   | -0.02487740 | 4.71270390  | 0.00000000  |
| F   | -0.01065990 | 4.66247100  | -2.35418150 |
| F   | -0.01065990 | 4.66247100  | 2.35418150  |
| F   | 0.21941250  | 1.99410270  | -2.36408220 |
| F   | 0.21941250  | 1.99410270  | 2.36408220  |
| H   | -0.10873660 | 5.79203620  | 0.00000000  |
| 11. |             |             |             |
| N   | 0.45963730  | -3.84878920 | 0.00000000  |
| C   | 0.45814480  | -5.02179370 | 0.00000000  |
| O   | 0.49218870  | -6.30989760 | 0.00000000  |
| C   | -0.82828420 | -6.92006100 | 0.00000000  |
| H   | -1.36697000 | -6.61800460 | -0.89611130 |
| H   | -0.64571380 | -7.98924540 | 0.00000000  |
| H   | -1.36697000 | -6.61800460 | 0.89611130  |
| Si  | 0.29592720  | -0.80694050 | 0.00000000  |
| F   | -0.43528970 | -1.32467810 | 1.28944500  |
| F   | -0.43528970 | -1.32467810 | -1.28944500 |
| F   | 1.81521110  | -1.20834420 | 0.00000000  |
| C   | 0.21217730  | 1.06189300  | 0.00000000  |
| C   | 0.18963680  | 1.79701110  | -1.18117960 |
| C   | 0.18963680  | 1.79701110  | 1.18117960  |
| C   | 0.12451860  | 3.18482880  | -1.19398710 |
| C   | 0.12451860  | 3.18482880  | 1.19398710  |
| C   | 0.11343900  | 3.90653420  | 0.00000000  |
| F   | 0.06706310  | 3.79933300  | -2.37158820 |
| F   | 0.06706310  | 3.79933300  | 2.37158820  |
| F   | 0.23001220  | 1.17215210  | -2.35954040 |
| F   | 0.23001220  | 1.17215210  | 2.35954040  |
| C   | 0.02820260  | 5.41479610  | 0.00000000  |
| F   | 0.61698280  | 5.94425220  | -1.07307670 |
| F   | 0.61698280  | 5.94425220  | 1.07307670  |
| F   | -1.25283750 | 5.81205900  | 0.00000000  |
| 12. |             |             |             |
| N   | 0.39371700  | -3.33227350 | 0.00000000  |
| C   | 0.44948440  | -4.50387900 | 0.00000000  |
| O   | 0.54669380  | -5.78837650 | 0.00000000  |
| C   | -0.74193550 | -6.46372620 | 0.00000000  |
| H   | -1.29482920 | -6.18889890 | -0.89618780 |
| H   | -0.50606080 | -7.52240200 | 0.00000000  |
| H   | -1.29482920 | -6.18889890 | 0.89618780  |
| Si  | 0.24498590  | -0.31171430 | 0.00000000  |
| F   | -0.49133150 | -0.81785350 | 1.29068400  |
| F   | -0.49133150 | -0.81785350 | -1.29068400 |
| F   | 1.76204780  | -0.72074840 | 0.00000000  |
| C   | 0.17666940  | 1.56017690  | 0.00000000  |
| C   | 0.16355670  | 2.29028080  | -1.18763190 |
| C   | 0.16355670  | 2.29028080  | 1.18763190  |
| C   | 0.10974500  | 3.67679860  | -1.20123550 |
| C   | 0.10974500  | 3.67679860  | 1.20123550  |
| C   | 0.08029210  | 4.38700800  | 0.00000000  |
| F   | 0.09302130  | 4.33170920  | -2.35567430 |
| F   | 0.09302130  | 4.33170920  | 2.35567430  |
| F   | 0.21189490  | 1.66032170  | -2.36172060 |
| F   | 0.21189490  | 1.66032170  | 2.36172060  |
| C   | 0.02711370  | 5.80973690  | 0.00000000  |
| N   | -0.01712190 | 6.98148250  | 0.00000000  |
| 13. |             |             |             |

|    |             |             |             |
|----|-------------|-------------|-------------|
| N  | -0.00931130 | -3.99613920 | 0.00000000  |
| C  | 0.00743060  | -5.16372670 | 0.00000000  |
| C  | 0.02880590  | -6.61992510 | 0.00000000  |
| H  | -0.47748820 | -6.99941870 | 0.88659410  |
| H  | 1.05790900  | -6.97678090 | 0.00000000  |
| H  | -0.47748820 | -6.99941870 | -0.88659410 |
| Si | -0.00482880 | -0.81380840 | 0.00000000  |
| F  | -0.75309810 | -1.32162390 | 1.28654500  |
| F  | -0.75309810 | -1.32162390 | -1.28654500 |
| F  | 1.48220080  | -1.33293780 | 0.00000000  |
| C  | 0.00405290  | 1.04154130  | 0.00000000  |
| C  | 0.01713590  | 1.78262460  | -1.18103560 |
| C  | 0.01713590  | 1.78262460  | 1.18103560  |
| C  | 0.02571970  | 3.16596770  | -1.18716790 |
| C  | 0.02571970  | 3.16596770  | 1.18716790  |
| C  | 0.02347710  | 3.89739880  | 0.00000000  |
| F  | 0.02600940  | 3.84108830  | -2.34629350 |
| F  | 0.02600940  | 3.84108830  | 2.34629350  |
| F  | 0.03236440  | 1.15813460  | -2.36580190 |
| F  | 0.03236440  | 1.15813460  | 2.36580190  |
| N  | 0.10125140  | 5.27227700  | 0.00000000  |
| H  | -0.21613670 | 5.71927790  | -0.84733220 |
| H  | -0.21613670 | 5.71927790  | 0.84733220  |

#### 14.

|    |             |             |             |
|----|-------------|-------------|-------------|
| N  | 0.05583990  | -4.47368170 | 0.00000000  |
| C  | 0.03394920  | -5.64105140 | 0.00000000  |
| C  | 0.00728020  | -7.09706670 | 0.00000000  |
| H  | 1.02413080  | -7.48745340 | 0.00000000  |
| H  | -0.51127280 | -7.45945860 | -0.88665630 |
| H  | -0.51127280 | -7.45945860 | 0.88665630  |
| Si | 0.15476580  | -1.33665450 | 0.00000000  |
| F  | -0.61283620 | -1.81039420 | 1.28692130  |
| F  | -0.61283620 | -1.81039420 | -1.28692130 |
| F  | 1.62778690  | -1.89060000 | 0.00000000  |
| C  | 0.22710960  | 0.52419540  | 0.00000000  |
| C  | 0.26733520  | 1.25681070  | -1.18495290 |
| C  | 0.26733520  | 1.25681070  | 1.18495290  |
| C  | 0.31804190  | 2.64334170  | -1.19679060 |
| C  | 0.31804190  | 2.64334170  | 1.19679060  |
| C  | 0.34874090  | 3.35944860  | 0.00000000  |
| F  | 0.34266030  | 3.30360930  | -2.35301790 |
| F  | 0.34266030  | 3.30360930  | 2.35301790  |
| F  | 0.26476570  | 0.62425580  | -2.36432370 |
| F  | 0.26476570  | 0.62425580  | 2.36432370  |
| O  | 0.46307830  | 4.70755550  | 0.00000000  |
| C  | -0.78966170 | 5.41804030  | 0.00000000  |
| H  | -0.83089320 | 6.03988080  | 0.89323420  |
| H  | -0.83089320 | 6.03988080  | -0.89323420 |
| H  | -1.62862190 | 4.72117660  | 0.00000000  |

#### 15.

|    |             |             |             |
|----|-------------|-------------|-------------|
| N  | 0.00798020  | -4.21861540 | 0.00000000  |
| C  | 0.02295580  | -5.38611000 | 0.00000000  |
| C  | 0.04179490  | -6.84226370 | 0.00000000  |
| H  | -0.46521200 | -7.22066270 | 0.88664290  |
| H  | -0.46521200 | -7.22066270 | -0.88664290 |
| H  | 1.07030220  | -7.20080100 | 0.00000000  |
| Si | -0.01834430 | -1.07541450 | 0.00000000  |
| F  | -0.76571540 | -1.58059400 | 1.28687580  |
| F  | -0.76571540 | -1.58059400 | -1.28687580 |

|   |             |             |             |
|---|-------------|-------------|-------------|
| F | 1.47588270  | -1.57025810 | 0.00000000  |
| C | -0.01930450 | 0.78653680  | 0.00000000  |
| C | -0.00627730 | 1.52251480  | -1.18272820 |
| C | -0.00627730 | 1.52251480  | 1.18272820  |
| C | -0.01082520 | 2.91031620  | -1.18323420 |
| C | -0.01082520 | 2.91031620  | 1.18323420  |
| C | -0.00911450 | 3.64084270  | 0.00000000  |
| F | -0.00589320 | 3.55707130  | -2.35456310 |
| F | -0.00589320 | 3.55707130  | 2.35456310  |
| F | 0.01796840  | 0.89329260  | -2.36379900 |
| F | 0.01796840  | 0.89329260  | 2.36379900  |
| C | -0.01799100 | 5.13885440  | 0.00000000  |
| H | -1.04337670 | 5.51545120  | 0.00000000  |
| H | 0.48056240  | 5.52395060  | 0.88769680  |
| H | 0.48056240  | 5.52395060  | -0.88769680 |

#### 16.

|    |             |             |             |
|----|-------------|-------------|-------------|
| N  | 0.00056540  | -3.39218910 | 0.00000000  |
| C  | 0.00999280  | -4.55966390 | 0.00000000  |
| C  | 0.02187690  | -6.01583980 | 0.00000000  |
| H  | -0.48697410 | -6.39168970 | 0.88666250  |
| H  | -0.48697410 | -6.39168970 | -0.88666250 |
| H  | 1.04868170  | -6.37919700 | 0.00000000  |
| Si | -0.02314720 | -0.27138640 | 0.00000000  |
| F  | -0.77253380 | -0.77073670 | 1.28731150  |
| F  | -0.77253380 | -0.77073670 | -1.28731150 |
| F  | 1.47204640  | -0.76163930 | 0.00000000  |
| C  | -0.01974640 | 1.59387160  | 0.00000000  |
| C  | -0.00556170 | 2.32405380  | -1.18734790 |
| C  | -0.00556170 | 2.32405380  | 1.18734790  |
| C  | -0.00549170 | 3.71308490  | -1.19090510 |
| C  | -0.00549170 | 3.71308490  | 1.19090510  |
| C  | -0.00736420 | 4.41921030  | 0.00000000  |
| F  | 0.00307280  | 4.36802820  | -2.35415800 |
| F  | 0.00307280  | 4.36802820  | 2.35415800  |
| F  | 0.01827780  | 1.68977890  | -2.36408500 |
| F  | 0.01827780  | 1.68977890  | 2.36408500  |
| H  | -0.00448440 | 5.50179470  | 0.00000000  |

#### 17.

|    |             |             |             |
|----|-------------|-------------|-------------|
| N  | -0.00209310 | -4.17509790 | 0.00000000  |
| C  | 0.00713510  | -5.34235830 | 0.00000000  |
| C  | 0.01872950  | -6.79840880 | 0.00000000  |
| H  | 0.53364610  | -7.16574760 | -0.88672230 |
| H  | 0.53364610  | -7.16574760 | 0.88672230  |
| H  | -1.00218090 | -7.17799520 | 0.00000000  |
| Si | -0.02253920 | -1.11478140 | 0.00000000  |
| F  | -0.77448500 | -1.59851050 | 1.29031600  |
| F  | -0.77448500 | -1.59851050 | -1.29031600 |
| F  | 1.47578780  | -1.59129940 | 0.00000000  |
| C  | -0.01474020 | 0.75545900  | 0.00000000  |
| C  | -0.00125940 | 1.49073570  | -1.18125390 |
| C  | -0.00125940 | 1.49073570  | 1.18125390  |
| C  | 0.00163110  | 2.88006020  | -1.19400180 |
| C  | 0.00163110  | 2.88006020  | 1.19400180  |
| C  | 0.02598020  | 3.60141780  | 0.00000000  |
| F  | -0.02552980 | 3.49660130  | -2.37156620 |
| F  | -0.02552980 | 3.49660130  | 2.37156620  |
| F  | 0.00874910  | 0.86457490  | -2.35956300 |
| F  | 0.00874910  | 0.86457490  | 2.35956300  |
| C  | 0.01494610  | 5.11210480  | 0.00000000  |



|            |             |             |             |
|------------|-------------|-------------|-------------|
| F          | 0.62917900  | 5.61184110  | -1.07308040 |
| F          | 0.62917900  | 5.61184110  | 1.07308040  |
| F          | -1.24488760 | 5.57184920  | 0.00000000  |
| <b>18.</b> |             |             |             |
| N          | -0.00842920 | -3.67399510 | 0.00000000  |
| C          | 0.00681060  | -4.84111110 | 0.00000000  |
| C          | 0.02580580  | -6.29698740 | 0.00000000  |
| H          | -0.48126490 | -6.67491690 | 0.88677260  |
| H          | -0.48126490 | -6.67491690 | -0.88677260 |
| H          | 1.05450460  | -6.65488480 | 0.00000000  |
| Si         | -0.02797820 | -0.63544820 | 0.00000000  |
| F          | -0.78106140 | -1.11367330 | 1.29139020  |
| F          | -0.78106140 | -1.11367330 | -1.29139020 |
| F          | 1.47130060  | -1.10767320 | 0.00000000  |
| C          | -0.02088130 | 1.23707250  | 0.00000000  |
| C          | -0.00506070 | 1.96708190  | -1.18772160 |
| C          | -0.00506070 | 1.96708190  | 1.18772160  |
| C          | -0.00404420 | 3.35463420  | -1.20127400 |
| C          | -0.00404420 | 3.35463420  | 1.20127400  |
| C          | -0.00542090 | 4.06540460  | 0.00000000  |
| F          | 0.00534340  | 4.00966890  | -2.35564180 |
| F          | 0.00534340  | 4.00966890  | 2.35564180  |
| F          | 0.01865340  | 1.33559970  | -2.36170400 |
| F          | 0.01865340  | 1.33559970  | 2.36170400  |
| C          | -0.00183200 | 5.48912810  | 0.00000000  |
| N          | 0.00098880  | 6.66170590  | 0.00000000  |
| <b>19.</b> |             |             |             |
| N          | 0.05602750  | -5.12480770 | 0.00000000  |
| C          | 0.08258300  | -6.28984300 | 0.00000000  |
| H          | 0.10720530  | -7.35682090 | 0.00000000  |
| Si         | 0.02486950  | -1.86639760 | 0.00000000  |
| F          | -0.71524580 | -2.39479200 | 1.28349640  |
| F          | -0.71524580 | -2.39479200 | -1.28349640 |
| F          | 1.51325830  | -2.38190150 | 0.00000000  |
| C          | 0.01144100  | -0.01391920 | 0.00000000  |
| C          | 0.01495910  | 0.72667540  | -1.18154090 |
| C          | 0.01495910  | 0.72667540  | 1.18154090  |
| C          | 0.00627300  | 2.10984800  | -1.18753280 |
| C          | 0.00627300  | 2.10984800  | 1.18753280  |
| C          | -0.00511030 | 2.84101860  | 0.00000000  |
| F          | -0.00192510 | 2.78490750  | -2.34625420 |
| F          | -0.00192510 | 2.78490750  | 2.34625420  |
| F          | 0.03752800  | 0.10119110  | -2.36545550 |
| F          | 0.03752800  | 0.10119110  | 2.36545550  |
| N          | 0.05521500  | 4.21601150  | 0.00000000  |
| H          | -0.26433400 | 4.66049990  | -0.84777030 |
| H          | -0.26433400 | 4.66049990  | 0.84777030  |
| <b>20.</b> |             |             |             |
| N          | 0.05217260  | -5.57655090 | 0.00000000  |
| C          | 0.02455410  | -6.74142310 | 0.00000000  |
| H          | -0.00035710 | -7.80846240 | 0.00000000  |
| Si         | 0.15667490  | -2.35737910 | 0.00000000  |
| F          | -0.60886690 | -2.84442760 | 1.28352230  |
| F          | -0.60886690 | -2.84442760 | -1.28352230 |
| F          | 1.62441890  | -2.92576560 | 0.00000000  |
| C          | 0.22851260  | -0.49950210 | 0.00000000  |
| C          | 0.26831160  | 0.23236140  | -1.18551220 |
| C          | 0.26831160  | 0.23236140  | 1.18551220  |

|            |             |             |             |
|------------|-------------|-------------|-------------|
| C          | 0.31882060  | 1.61881130  | -1.19712550 |
| C          | 0.31882060  | 1.61881130  | 1.19712550  |
| C          | 0.34949390  | 2.33469030  | 0.00000000  |
| F          | 0.34326610  | 2.27900930  | -2.35293580 |
| F          | 0.34326610  | 2.27900930  | 2.35293580  |
| F          | 0.26518060  | -0.40153840 | -2.36393410 |
| F          | 0.26518060  | -0.40153840 | 2.36393410  |
| O          | 0.46419000  | 3.68232560  | 0.00000000  |
| C          | -0.78820100 | 4.39407230  | 0.00000000  |
| H          | -0.82858240 | 5.01583110  | 0.89326460  |
| H          | -0.82858240 | 5.01583110  | -0.89326460 |
| H          | -1.62771760 | 3.69790080  | 0.00000000  |
| <b>21.</b> |             |             |             |
| N          | -0.00150630 | -5.32781020 | -0.00025600 |
| C          | 0.00932850  | -6.49297380 | -0.00073450 |
| H          | 0.01936180  | -7.56024430 | -0.00118800 |
| Si         | -0.01564220 | -2.10944360 | 0.00027550  |
| F          | -0.76057860 | -2.62509630 | 1.28474000  |
| F          | -0.76337800 | -2.62489970 | -1.28265420 |
| F          | 1.47231380  | -2.62358620 | -0.00145360 |
| C          | -0.01119660 | -0.25032100 | 0.00044800  |
| C          | 0.00353050  | 0.48464200  | -1.18292550 |
| C          | 0.00305630  | 0.48502930  | 1.18360160  |
| C          | 0.00088750  | 1.87238030  | -1.18356680 |
| C          | 0.00024530  | 1.87276650  | 1.18363450  |
| C          | 0.00367750  | 2.60271480  | -0.00008790 |
| F          | 0.00735120  | 2.51873260  | -2.35461800 |
| F          | 0.00619880  | 2.51965950  | 2.35439020  |
| F          | 0.02681170  | -0.14621420 | -2.36293970 |
| F          | 0.02586680  | -0.14524450 | 2.36390490  |
| C          | -0.00038370 | 4.10080880  | -0.00016830 |
| H          | -1.02459620 | 4.48051310  | 0.00183200  |
| H          | 0.50100350  | 4.48433050  | 0.88657860  |
| H          | 0.49764830  | 4.48425650  | -0.88881300 |
| <b>22.</b> |             |             |             |
| N          | 0.00119270  | -4.54448330 | 0.00000000  |
| C          | 0.01398460  | -5.70955040 | 0.00000000  |
| H          | 0.02575910  | -6.77684000 | 0.00000000  |
| Si         | -0.01899980 | -1.33883790 | 0.00000000  |
| F          | -0.76605240 | -1.85121040 | 1.28387490  |
| F          | -0.76605240 | -1.85121040 | -1.28387490 |
| F          | 1.47082740  | -1.84568090 | 0.00000000  |
| C          | -0.01480140 | 0.52345220  | 0.00000000  |
| C          | -0.00086860 | 1.25280200  | -1.18792510 |
| C          | -0.00086860 | 1.25280200  | 1.18792510  |
| C          | -0.00075430 | 2.64179430  | -1.19126350 |
| C          | -0.00075430 | 2.64179430  | 1.19126350  |
| C          | -0.00264400 | 3.34746710  | 0.00000000  |
| F          | 0.00762630  | 3.29663440  | -2.35406330 |
| F          | 0.00762630  | 3.29663440  | 2.35406330  |
| F          | 0.02232860  | 0.61717000  | -2.36368070 |
| F          | 0.02232860  | 0.61717000  | 2.36368070  |
| H          | 0.00012210  | 4.43009250  | 0.00000000  |
| <b>23.</b> |             |             |             |
| N          | 0.00321720  | -5.29365340 | 0.00000000  |
| C          | 0.01532500  | -6.45852210 | 0.00000000  |
| H          | 0.02642910  | -7.52592930 | 0.00000000  |
| Si         | -0.01709640 | -2.13883900 | 0.00000000  |

|   |             |             |             |
|---|-------------|-------------|-------------|
| F | -0.76570800 | -2.63876560 | 1.28629780  |
| F | -0.76570800 | -2.63876560 | -1.28629780 |
| F | 1.47571770  | -2.63266270 | 0.00000000  |
| C | -0.01046930 | -0.27195510 | 0.00000000  |
| C | 0.00180720  | 0.46242070  | -1.18189110 |
| C | 0.00180720  | 0.46242070  | 1.18189110  |
| C | 0.00329220  | 1.85171880  | -1.19436530 |
| C | 0.00329220  | 1.85171880  | 1.19436530  |
| C | 0.02699630  | 2.57268260  | 0.00000000  |
| F | -0.02468750 | 2.46808700  | -2.37151220 |
| F | -0.02468750 | 2.46808700  | 2.37151220  |
| F | 0.01166480  | -0.16520520 | -2.35915780 |
| F | 0.01166480  | -0.16520520 | 2.35915780  |
| C | 0.01488810  | 4.08379260  | 0.00000000  |
| F | 0.62879110  | 4.58339920  | -1.07308780 |
| F | 0.62879110  | 4.58339920  | 1.07308780  |
| F | -1.24532740 | 4.54177670  | 0.00000000  |

#### 24.

|    |             |             |             |
|----|-------------|-------------|-------------|
| N  | -0.00174030 | -4.82511410 | 0.00000000  |
| C  | 0.01464500  | -5.98985120 | 0.00000000  |
| H  | 0.02958590  | -7.05724880 | 0.00000000  |
| Si | -0.02134790 | -1.68754550 | 0.00000000  |
| F  | -0.77088860 | -2.18311960 | 1.28703030  |
| F  | -0.77088860 | -2.18311960 | -1.28703030 |
| F  | 1.47217400  | -2.17795290 | 0.00000000  |
| C  | -0.01516990 | 0.18143900  | 0.00000000  |
| C  | -0.00031630 | 0.91046960  | -1.18839780 |
| C  | -0.00031630 | 0.91046960  | 1.18839780  |
| C  | -0.00014170 | 2.29797360  | -1.20167050 |
| C  | -0.00014170 | 2.29797360  | 1.20167050  |
| C  | -0.00191720 | 3.00832420  | 0.00000000  |
| F  | 0.00854880  | 2.95291230  | -2.35557060 |
| F  | 0.00854880  | 2.95291230  | 2.35557060  |
| F  | 0.02292580  | 0.27738380  | -2.36126470 |
| F  | 0.02292580  | 0.27738380  | 2.36126470  |
| C  | 0.00069370  | 4.43205960  | 0.00000000  |
| N  | 0.00282050  | 5.60465050  | 0.00000000  |

#### 25.

|    |             |             |             |
|----|-------------|-------------|-------------|
| N  | -0.00836980 | -4.06755130 | 0.00000000  |
| C  | 0.00767680  | -5.23552610 | 0.00000000  |
| C  | 0.02813690  | -6.71486680 | 0.00000000  |
| F  | 1.28140140  | -7.15764030 | 0.00000000  |
| F  | -0.58905410 | -7.18341890 | -1.08000630 |
| F  | -0.58905410 | -7.18341890 | 1.08000630  |
| Si | -0.00225460 | -0.75706500 | 0.00000000  |
| F  | -0.74607800 | -1.28936170 | 1.28046610  |
| F  | -0.74607800 | -1.28936170 | -1.28046610 |
| F  | 1.47615450  | -1.30305670 | 0.00000000  |
| C  | 0.00527330  | 1.09222700  | 0.00000000  |
| C  | 0.01685320  | 1.83207380  | -1.18210910 |
| C  | 0.01685320  | 1.83207380  | 1.18210910  |
| C  | 0.02378280  | 3.21503450  | -1.18797120 |
| C  | 0.02378280  | 3.21503450  | 1.18797120  |
| C  | 0.02064250  | 3.94616980  | 0.00000000  |
| F  | 0.02329510  | 3.89011440  | -2.34620590 |
| F  | 0.02329510  | 3.89011440  | 2.34620590  |
| F  | 0.03191710  | 1.20494760  | -2.36507910 |
| F  | 0.03191710  | 1.20494760  | 2.36507910  |
| N  | 0.09595010  | 5.31927110  | 0.00000000  |

|            |             |             |             |
|------------|-------------|-------------|-------------|
| H          | -0.21302170 | 5.76962940  | -0.84846120 |
| H          | -0.21302170 | 5.76962940  | 0.84846120  |
| <b>26.</b> |             |             |             |
| N          | 0.05378020  | -4.55008690 | -0.00022520 |
| C          | 0.02674020  | -5.71772210 | -0.00001130 |
| C          | -0.00745950 | -7.19723460 | 0.00025930  |
| F          | 1.22853270  | -7.68537650 | -0.01270380 |
| F          | -0.65282400 | -7.64194120 | -1.07309770 |
| F          | -0.63022450 | -7.64207230 | 1.08682930  |
| Si         | 0.16062650  | -1.28340350 | -0.00020410 |
| F          | -0.60328480 | -1.78326950 | 1.28009160  |
| F          | -0.60267830 | -1.78331110 | -1.28085360 |
| F          | 1.62369490  | -1.86533370 | 0.00016940  |
| C          | 0.23176070  | 0.57142040  | -0.00027460 |
| C          | 0.27121350  | 1.30248350  | -1.18638000 |
| C          | 0.27099200  | 1.30249110  | 1.18583600  |
| C          | 0.32130540  | 2.68884850  | -1.19776640 |
| C          | 0.32108760  | 2.68884890  | 1.19723190  |
| C          | 0.35185730  | 3.40450710  | -0.00026640 |
| F          | 0.34569350  | 3.34888610  | -2.35311810 |
| F          | 0.34523230  | 3.34891270  | 2.35257930  |
| F          | 0.26777540  | 0.66713190  | -2.36382440 |
| F          | 0.26739650  | 0.66711300  | 2.36327330  |
| O          | 0.46706790  | 4.75154170  | -0.00027430 |
| C          | -0.78486750 | 5.46489410  | 0.00053600  |
| H          | -0.82363540 | 6.08649270  | 0.89389120  |
| H          | -0.82471350 | 6.08659000  | -0.89270520 |
| H          | -1.62506930 | 4.76958990  | 0.00100750  |
| <b>27.</b> |             |             |             |
| N          | -0.00307450 | -4.30031680 | 0.00000000  |
| C          | 0.00808780  | -5.46823660 | 0.00000000  |
| C          | 0.02235510  | -6.94800030 | 0.00000000  |
| F          | 1.27383190  | -7.39542650 | 0.00000000  |
| F          | -0.59674120 | -7.41347460 | -1.08002020 |
| F          | -0.59674120 | -7.41347460 | 1.08002020  |
| Si         | -0.01704040 | -1.01718740 | 0.00000000  |
| F          | -0.76081730 | -1.54634990 | 1.28038020  |
| F          | -0.76081730 | -1.54634990 | -1.28038020 |
| F          | 1.46685030  | -1.54469630 | 0.00000000  |
| C          | -0.01401700 | 0.83874410  | 0.00000000  |
| C          | -0.00067560 | 1.57307490  | -1.18388330 |
| C          | -0.00067560 | 1.57307490  | 1.18388330  |
| C          | -0.00349750 | 2.96074480  | -1.18393560 |
| C          | -0.00349750 | 2.96074480  | 1.18393560  |
| C          | -0.00079360 | 3.69058430  | 0.00000000  |
| F          | 0.00175820  | 3.60713130  | -2.35439660 |
| F          | 0.00175820  | 3.60713130  | 2.35439660  |
| F          | 0.02159090  | 0.94100780  | -2.36304110 |
| F          | 0.02159090  | 0.94100780  | 2.36304110  |
| C          | -0.00794910 | 5.18851650  | 0.00000000  |
| H          | -1.03314600 | 5.56560100  | 0.00000000  |
| H          | 0.49083030  | 5.57307460  | 0.88775640  |
| H          | 0.49083030  | 5.57307460  | -0.88775640 |
| <b>28.</b> |             |             |             |
| N          | -0.01146800 | -3.47136640 | 0.00000000  |
| C          | -0.00158070 | -4.63922430 | 0.00000000  |
| C          | 0.01101700  | -6.11923310 | 0.00000000  |
| F          | 1.26199970  | -6.56773390 | 0.00000000  |

|    |             |             |             |
|----|-------------|-------------|-------------|
| F  | -0.60861500 | -6.58366130 | 1.08003300  |
| F  | -0.60861500 | -6.58366130 | -1.08003300 |
| Si | -0.02176370 | -0.20391440 | 0.00000000  |
| F  | -0.76737760 | -0.72810650 | 1.28062470  |
| F  | -0.76737760 | -0.72810650 | -1.28062470 |
| F  | 1.46254020  | -0.72836360 | 0.00000000  |
| C  | -0.01452860 | 1.65521020  | 0.00000000  |
| C  | -0.00038120 | 2.38364630  | -1.18856530 |
| C  | -0.00038120 | 2.38364630  | 1.18856530  |
| C  | 0.00081000  | 3.77259410  | -1.19166380 |
| C  | 0.00081000  | 3.77259410  | 1.19166380  |
| C  | -0.00053980 | 4.47778660  | 0.00000000  |
| F  | 0.00943570  | 4.42724230  | -2.35394820 |
| F  | 0.00943570  | 4.42724230  | 2.35394820  |
| F  | 0.02175990  | 1.74647880  | -2.36329560 |
| F  | 0.02175990  | 1.74647880  | 2.36329560  |
| H  | 0.00306050  | 5.56045160  | 0.00000000  |

## 29.

|    |             |             |             |
|----|-------------|-------------|-------------|
| N  | 0.00144940  | -4.27609250 | 0.00023930  |
| C  | 0.01019970  | -5.44378150 | 0.00055210  |
| C  | 0.02137590  | -6.92439860 | 0.00093760  |
| F  | 1.27127940  | -7.37323640 | -0.04050060 |
| F  | -0.63435500 | -7.38790770 | -1.05763600 |
| F  | -0.56238390 | -7.38680610 | 1.10130310  |
| Si | -0.01411750 | -1.04855970 | -0.00111810 |
| F  | -0.76166490 | -1.56394770 | 1.28032160  |
| F  | -0.75699080 | -1.56418080 | -1.28517670 |
| F  | 1.47425260  | -1.55706090 | 0.00163800  |
| C  | -0.01052110 | 0.81496030  | -0.00100830 |
| C  | -0.00108860 | 1.54890300  | -1.18328680 |
| C  | 0.00060520  | 1.54798240  | 1.18181340  |
| C  | -0.00227280 | 2.93818340  | -1.19488870 |
| C  | -0.00119810 | 2.93722840  | 1.19459150  |
| C  | 0.02054440  | 3.65828180  | 0.00013020  |
| F  | -0.03214280 | 3.55471600  | -2.37134340 |
| F  | -0.03042870 | 3.55282000  | 2.37155450  |
| F  | 0.00829500  | 0.92032880  | -2.35980830 |
| F  | 0.01219010  | 0.91830530  | 2.35775170  |
| C  | 0.00554210  | 5.16986690  | 0.00080590  |
| F  | 0.61781130  | 5.67046870  | -1.07246310 |
| F  | 0.61922010  | 5.66947440  | 1.07374170  |
| F  | -1.25560100 | 5.62445270  | 0.00184950  |

## 30.

|    |             |             |             |
|----|-------------|-------------|-------------|
| N  | -0.01722380 | -3.77543750 | 0.00000000  |
| C  | -0.00421450 | -4.94302690 | 0.00000000  |
| C  | 0.01214810  | -6.42385230 | 0.00000000  |
| F  | 1.26430790  | -6.86794940 | 0.00000000  |
| F  | -0.60634350 | -6.88862200 | -1.08007890 |
| F  | -0.60634350 | -6.88862200 | 1.08007890  |
| Si | -0.02545680 | -0.56126380 | 0.00000000  |
| F  | -0.77341880 | -1.07019590 | 1.28335090  |
| F  | -0.77341880 | -1.07019590 | -1.28335090 |
| F  | 1.46157020  | -1.07237050 | 0.00000000  |
| C  | -0.01547360 | 1.30420810  | 0.00000000  |
| C  | -0.00004370 | 2.03228210  | -1.18909970 |
| C  | -0.00004370 | 2.03228210  | 1.18909970  |
| C  | 0.00184020  | 3.41974610  | -1.20207060 |
| C  | 0.00184020  | 3.41974610  | 1.20207060  |

|            |             |             |             |
|------------|-------------|-------------|-------------|
| C          | 0.00092920  | 4.12970080  | 0.00000000  |
| F          | 0.01105910  | 4.07451280  | -2.35545740 |
| F          | 0.01105910  | 4.07451280  | 2.35545740  |
| F          | 0.02177760  | 1.39753730  | -2.36090230 |
| F          | 0.02177760  | 1.39753730  | 2.36090230  |
| C          | 0.00515950  | 5.55342420  | 0.00000000  |
| N          | 0.00851190  | 6.72604650  | 0.00000000  |
| <b>31.</b> |             |             |             |
| N          | 0.04563040  | -4.73488910 | 0.00000000  |
| C          | 0.07777060  | -5.90884700 | 0.00000000  |
| C          | 0.11558200  | -7.28683980 | 0.00000000  |
| N          | 0.14763010  | -8.46130860 | 0.00000000  |
| Si         | 0.01444850  | -1.41087810 | 0.00000000  |
| F          | -0.72271460 | -1.95540710 | 1.27953980  |
| F          | -0.72271460 | -1.95540710 | -1.27953980 |
| F          | 1.49738840  | -1.94529090 | 0.00000000  |
| C          | 0.00176710  | 0.43722590  | 0.00000000  |
| C          | 0.00539260  | 1.17694560  | -1.18231090 |
| C          | 0.00539260  | 1.17694560  | 1.18231090  |
| C          | -0.00250250 | 2.55980990  | -1.18813870 |
| C          | -0.00250250 | 2.55980990  | 1.18813870  |
| C          | -0.01333050 | 3.29084000  | 0.00000000  |
| F          | -0.01011650 | 3.23482230  | -2.34618730 |
| F          | -0.01011650 | 3.23482230  | 2.34618730  |
| F          | 0.02702680  | 0.54947700  | -2.36495330 |
| F          | 0.02702680  | 0.54947700  | 2.36495330  |
| N          | 0.04724830  | 4.66420250  | 0.00000000  |
| H          | -0.26415330 | 5.11224480  | -0.84874960 |
| H          | -0.26415330 | 5.11224480  | 0.84874960  |
| <b>32.</b> |             |             |             |
| N          | 0.05300750  | -5.21501300 | 0.00000000  |
| C          | 0.02600890  | -6.38898390 | 0.00000000  |
| C          | -0.00576730 | -7.76713580 | 0.00000000  |
| N          | -0.03320330 | -8.94174310 | 0.00000000  |
| Si         | 0.15941770  | -1.91952360 | 0.00000000  |
| F          | -0.60347200 | -2.42432150 | 1.27932080  |
| F          | -0.60347200 | -2.42432150 | -1.27932080 |
| F          | 1.62079690  | -2.50638240 | 0.00000000  |
| C          | 0.23007240  | -0.06592370 | 0.00000000  |
| C          | 0.26931400  | 0.66483830  | -1.18634880 |
| C          | 0.26931400  | 0.66483830  | 1.18634880  |
| C          | 0.31970810  | 2.05115130  | -1.19765500 |
| C          | 0.31970810  | 2.05115130  | 1.19765500  |
| C          | 0.35048250  | 2.76672890  | 0.00000000  |
| F          | 0.34413830  | 2.71112580  | -2.35281260 |
| F          | 0.34413830  | 2.71112580  | 2.35281260  |
| F          | 0.26555500  | 0.02886010  | -2.36340120 |
| F          | 0.26555500  | 0.02886010  | 2.36340120  |
| O          | 0.46644100  | 4.11345700  | 0.00000000  |
| C          | -0.78495980 | 4.82811740  | 0.00000000  |
| H          | -0.82348960 | 5.44974260  | 0.89331080  |
| H          | -0.82348960 | 5.44974260  | -0.89331080 |
| H          | -1.62580400 | 4.13360890  | 0.00000000  |
| <b>33.</b> |             |             |             |
| N          | -0.00233700 | -4.96082810 | 0.00056960  |
| C          | 0.00709920  | -6.13508420 | -0.00032870 |
| C          | 0.01819290  | -7.51354440 | -0.00137080 |
| N          | 0.02756510  | -8.68843240 | -0.00225050 |

|    |             |             |             |
|----|-------------|-------------|-------------|
| Si | -0.01450540 | -1.66201020 | 0.00050900  |
| F  | -0.75777980 | -2.19511870 | 1.27988780  |
| F  | -0.75751950 | -2.19542930 | -1.27888780 |
| F  | 1.46787770  | -2.19449740 | 0.00074920  |
| C  | -0.01110610 | 0.19285680  | 0.00019150  |
| C  | 0.00223590  | 0.92680280  | -1.18394910 |
| C  | 0.00240650  | 0.92699110  | 1.18423220  |
| C  | -0.00017850 | 2.31445460  | -1.18403840 |
| C  | -0.00010780 | 2.31462250  | 1.18409750  |
| C  | 0.00271470  | 3.04425690  | -0.00002580 |
| F  | 0.00520790  | 2.96058010  | -2.35440530 |
| F  | 0.00523670  | 2.96102690  | 2.35430940  |
| F  | 0.02407900  | 0.29413380  | -2.36274090 |
| F  | 0.02456910  | 0.29446300  | 2.36310350  |
| C  | -0.00405230 | 4.54216320  | 0.00003300  |
| H  | -1.02918070 | 4.91942210  | 0.00226320  |
| H  | 0.49663780  | 4.92654190  | 0.88679300  |
| H  | 0.49294460  | 4.92662910  | -0.88874160 |

#### 34.

|    |             |             |             |
|----|-------------|-------------|-------------|
| N  | 0.00084500  | -4.14889880 | 0.00000000  |
| C  | 0.01187640  | -5.32307140 | 0.00000000  |
| C  | 0.02499170  | -6.70152000 | 0.00000000  |
| N  | 0.03617530  | -7.87640060 | 0.00000000  |
| Si | -0.01895100 | -0.86288840 | 0.00000000  |
| F  | -0.76251890 | -1.39336840 | 1.27954970  |
| F  | -0.76251890 | -1.39336840 | -1.27954970 |
| F  | 1.46523260  | -1.38844040 | 0.00000000  |
| C  | -0.01598080 | 0.99513200  | 0.00000000  |
| C  | -0.00314210 | 1.72328200  | -1.18879190 |
| C  | -0.00314210 | 1.72328200  | 1.18879190  |
| C  | -0.00411880 | 3.11221440  | -1.19181730 |
| C  | -0.00411880 | 3.11221440  | 1.19181730  |
| C  | -0.00654390 | 3.81721960  | 0.00000000  |
| F  | 0.00343820  | 3.76678790  | -2.35390000 |
| F  | 0.00343820  | 3.76678790  | 2.35390000  |
| F  | 0.01981380  | 1.08556380  | -2.36315130 |
| F  | 0.01981380  | 1.08556380  | 2.36315130  |
| H  | -0.00458950 | 4.89990860  | 0.00000000  |

#### 35.

|    |             |             |             |
|----|-------------|-------------|-------------|
| N  | -0.00300540 | -4.93962830 | 0.00000000  |
| C  | 0.00605560  | -6.11365150 | 0.00000000  |
| C  | 0.01680750  | -7.49208610 | 0.00000000  |
| N  | 0.02598470  | -8.66702330 | 0.00000000  |
| Si | -0.01718100 | -1.68971320 | 0.00000000  |
| F  | -0.76269330 | -2.20851050 | 1.28155980  |
| F  | -0.76269330 | -2.20851050 | -1.28155980 |
| F  | 1.46854340  | -2.20667380 | 0.00000000  |
| C  | -0.00968520 | 0.17257100  | 0.00000000  |
| C  | 0.00202890  | 0.90571980  | -1.18278600 |
| C  | 0.00202890  | 0.90571980  | 1.18278600  |
| C  | 0.00330070  | 2.29497200  | -1.19488090 |
| C  | 0.00330070  | 2.29497200  | 1.19488090  |
| C  | 0.02707170  | 3.01533900  | 0.00000000  |
| F  | -0.02504880 | 2.91103080  | -2.37140600 |
| F  | -0.02504880 | 2.91103080  | 2.37140600  |
| F  | 0.01110800  | 0.27596170  | -2.35864310 |
| F  | 0.01110800  | 0.27596170  | 2.35864310  |
| C  | 0.01507840  | 4.52716420  | 0.00000000  |
| F  | 0.62906210  | 5.02576120  | -1.07310560 |

|            |             |             |             |
|------------|-------------|-------------|-------------|
| F          | 0.62906210  | 5.02576120  | 1.07310560  |
| F          | -1.24518510 | 4.98383200  | 0.00000000  |
| <b>36.</b> |             |             |             |
| N          | -0.00791770 | -4.45420420 | 0.00000000  |
| C          | 0.00476650  | -5.62813840 | 0.00000000  |
| C          | 0.01972780  | -7.00648540 | 0.00000000  |
| N          | 0.03247420  | -8.18141290 | 0.00000000  |
| Si         | -0.02285550 | -1.21644830 | 0.00000000  |
| F          | -0.76894860 | -1.73168050 | 1.28222330  |
| F          | -0.76894860 | -1.73168050 | -1.28222330 |
| F          | 1.46341690  | -1.73049180 | 0.00000000  |
| C          | -0.01584910 | 0.64787620  | 0.00000000  |
| C          | -0.00096580 | 1.37566140  | -1.18931890 |
| C          | -0.00096580 | 1.37566140  | 1.18931890  |
| C          | 0.00007370  | 2.76310420  | -1.20221060 |
| C          | 0.00007370  | 2.76310420  | 1.20221060  |
| C          | -0.00126490 | 3.47292380  | 0.00000000  |
| F          | 0.00896090  | 3.41778010  | -2.35542730 |
| F          | 0.00896090  | 3.41778010  | 2.35542730  |
| F          | 0.02114500  | 0.74035530  | -2.36077130 |
| F          | 0.02114500  | 0.74035530  | 2.36077130  |
| C          | 0.00212880  | 4.89665980  | 0.00000000  |
| N          | 0.00484290  | 6.06928030  | 0.00000000  |
| <b>37.</b> |             |             |             |
| N          | 0.09778030  | -4.12857850 | -0.03193440 |
| C          | -0.00321790 | -5.28844680 | -0.15331490 |
| N          | -0.04732980 | -6.62742220 | -0.28881350 |
| H          | -0.52296230 | -7.09512070 | 0.47092630  |
| H          | -0.37740280 | -6.93045840 | -1.19522770 |
| Si         | 0.06838420  | -0.99883200 | -0.21092190 |
| F          | -1.14194210 | -1.45050480 | 0.68972120  |
| F          | -0.07097490 | -1.61035880 | -1.65202200 |
| F          | 1.42870450  | -1.43972780 | 0.44481470  |
| C          | 0.04845080  | 0.85487240  | -0.32005620 |
| C          | -0.07317480 | 1.59151830  | -1.49640290 |
| C          | 0.16452680  | 1.58691890  | 0.85723610  |
| C          | -0.08753010 | 2.97954620  | -1.48181310 |
| C          | 0.16017520  | 2.97641140  | 0.94162560  |
| C          | 0.03401220  | 3.64876610  | -0.27244810 |
| F          | -0.21253390 | 3.67380620  | -2.61222850 |
| F          | -0.18891780 | 0.98346560  | -2.68174590 |
| F          | 0.27690780  | 0.91708580  | 2.02559980  |
| N          | 0.35545120  | 3.65374920  | 2.13418820  |
| H          | 0.09358720  | 3.12248160  | 2.95254260  |
| H          | -0.01537970 | 4.59332200  | 2.14133960  |
| F          | 0.01338590  | 4.98750590  | -0.26106500 |
| <b>38.</b> |             |             |             |
| N          | -0.09446770 | -4.43340050 | -0.49219730 |
| C          | 0.00249560  | -5.59983940 | -0.50115710 |
| N          | 0.04145820  | -6.94549410 | -0.50847900 |
| H          | 0.41272430  | -7.33456630 | -1.36469400 |
| H          | 0.47409590  | -7.34176140 | 0.31498380  |
| Si         | 0.08927850  | -1.32660620 | -0.50126110 |
| F          | -0.73251790 | -1.76767470 | 0.76353400  |
| F          | -0.64650170 | -1.78148430 | -1.81335950 |
| F          | 1.54642200  | -1.92069080 | -0.45031700 |
| C          | 0.21366180  | 0.53071890  | -0.50971730 |
| C          | 0.35806680  | 1.24445330  | -1.69830300 |



|   |             |            |             |
|---|-------------|------------|-------------|
| C | 0.19676170  | 1.28489400 | 0.66165800  |
| C | 0.44779130  | 2.62825380 | -1.72964950 |
| C | 0.28091750  | 2.67695650 | 0.69063640  |
| C | 0.39916610  | 3.33411500 | -0.53401900 |
| F | 0.57921670  | 3.27796190 | -2.88371670 |
| F | 0.42502530  | 0.59588390 | -2.86573870 |
| F | 0.10841080  | 0.65974550 | 1.84454540  |
| O | 0.30896500  | 3.38368040 | 1.84861700  |
| C | -0.98713860 | 3.51149170 | 2.45228230  |
| H | -0.83973150 | 4.09287460 | 3.35871340  |
| H | -1.66625810 | 4.03916230 | 1.77886170  |
| H | -1.39489040 | 2.53081130 | 2.70230230  |
| F | 0.47704850  | 4.66051460 | -0.56352510 |

### 39.

|    |             |             |             |
|----|-------------|-------------|-------------|
| N  | 0.15781400  | -4.29571820 | 0.19922390  |
| C  | 0.04867660  | -5.45770060 | 0.28939050  |
| N  | -0.00433730 | -6.79924020 | 0.39106510  |
| H  | -0.37103640 | -7.12301690 | 1.27595630  |
| H  | -0.44949830 | -7.24745570 | -0.39834620 |
| Si | 0.07822520  | -1.16992940 | 0.35326030  |
| F  | -0.02008810 | -1.76893590 | 1.80304580  |
| F  | -1.13861320 | -1.65422600 | -0.52005380 |
| F  | 1.43716940  | -1.58371590 | -0.32229770 |
| C  | 0.01931110  | 0.68499690  | 0.44882350  |
| C  | 0.08712410  | 1.41942260  | -0.73267480 |
| C  | -0.08575560 | 1.43260860  | 1.61927560  |
| C  | 0.05558850  | 2.80499750  | -0.82888720 |
| C  | -0.12155910 | 2.81976360  | 1.60075900  |
| C  | -0.04764760 | 3.48191770  | 0.38119340  |
| F  | -0.22253500 | 3.51162090  | 2.73404840  |
| F  | 0.19161440  | 0.72970460  | -1.88671570 |
| F  | -0.15720310 | 0.83276230  | 2.80987420  |
| C  | 0.13835790  | 3.51033900  | -2.14819040 |
| H  | 1.13016930  | 3.38771200  | -2.58699520 |
| H  | -0.58510550 | 3.09295360  | -2.84867990 |
| H  | -0.05818370 | 4.57351580  | -2.02924810 |
| F  | -0.08248760 | 4.81762380  | 0.39617310  |

### 40.

|    |             |             |             |
|----|-------------|-------------|-------------|
| N  | 0.07463130  | -3.76274010 | 0.01170970  |
| C  | 0.01681050  | -4.93206800 | 0.01157240  |
| N  | 0.02173430  | -6.27869860 | 0.01149830  |
| H  | -0.36776230 | -6.68470520 | 0.85162220  |
| H  | -0.36761150 | -6.68464600 | -0.82873360 |
| Si | 0.02741430  | -0.60140200 | 0.01164650  |
| F  | -0.72298960 | -1.10633760 | 1.29688790  |
| F  | -0.72131040 | -1.10497550 | -1.27551960 |
| F  | 1.52113400  | -1.09459030 | 0.01155020  |
| C  | 0.02699170  | 1.26102220  | 0.01096540  |
| C  | 0.04232160  | 1.99939900  | -1.17127010 |
| C  | 0.04250530  | 2.01124150  | 1.18642890  |
| C  | 0.04269020  | 3.38776240  | -1.19252680 |
| C  | 0.04274120  | 3.39531200  | 1.22453310  |
| C  | 0.04098260  | 4.07088300  | 0.01645890  |
| F  | 0.05249880  | 4.05079890  | -2.34547430 |
| F  | 0.06568910  | 1.37229510  | -2.35045070 |
| F  | 0.06674780  | 1.36302290  | 2.36172810  |
| F  | 0.04351850  | 5.40358470  | -0.00498630 |
| H  | 0.05126260  | 3.93484150  | 2.16235980  |

## 41.

|    |             |             |             |
|----|-------------|-------------|-------------|
| N  | 0.04201620  | -4.25571790 | 0.33004180  |
| C  | -0.00762750 | -5.42479120 | 0.35207750  |
| N  | 0.00837760  | -6.76964570 | 0.37975860  |
| H  | -0.39145080 | -7.16392330 | 1.22051390  |
| H  | -0.35439050 | -7.19823690 | -0.46098600 |
| Si | 0.02996390  | -1.20945380 | 0.41630070  |
| F  | -0.03389320 | -1.74512530 | 1.89072230  |
| F  | -1.23190860 | -1.66615550 | -0.40238980 |
| F  | 1.36096050  | -1.65418900 | -0.29025570 |
| C  | 0.01876350  | 0.65774230  | 0.46237180  |
| C  | 0.06957180  | 1.34718490  | -0.74880920 |
| C  | -0.03634320 | 1.43140760  | 1.61527000  |
| C  | 0.06832020  | 2.73498060  | -0.85444190 |
| C  | -0.04074740 | 2.82008460  | 1.57170430  |
| C  | 0.01160100  | 3.45329860  | 0.34074230  |
| F  | -0.09374180 | 3.53432700  | 2.68924780  |
| F  | 0.12154730  | 0.59821450  | -1.85725180 |
| F  | -0.08769480 | 0.86294230  | 2.81765090  |
| C  | 0.12239370  | 3.51523500  | -2.14313390 |
| F  | 0.17553460  | 2.73804730  | -3.22022210 |
| F  | -0.95787930 | 4.30000980  | -2.26360120 |
| F  | 1.20011770  | 4.31213640  | -2.16573960 |
| F  | 0.00650920  | 4.78162760  | 0.32042930  |

## 42.

|    |             |             |             |
|----|-------------|-------------|-------------|
| N  | -0.04452060 | -3.89188620 | -0.19128490 |
| C  | 0.02112780  | -5.06025170 | -0.18417180 |
| N  | 0.02305800  | -6.40491710 | -0.17594560 |
| H  | 0.41154900  | -6.81754880 | -1.01314480 |
| H  | 0.40418890  | -6.80704900 | 0.66973210  |
| Si | -0.07262800 | -0.87850080 | -0.16984740 |
| F  | -0.82692760 | -1.36088890 | 1.11872250  |
| F  | -0.81905560 | -1.34684420 | -1.46879660 |
| F  | 1.42961990  | -1.34256190 | -0.16843710 |
| C  | -0.06951590 | 0.99334710  | -0.16415290 |
| C  | -0.05281830 | 1.73375730  | -1.34455140 |
| C  | -0.05200580 | 1.73144990  | 1.01463240  |
| C  | -0.05036010 | 3.12374610  | -1.36607610 |
| C  | -0.04843790 | 3.12669430  | 1.05191330  |
| C  | -0.05007110 | 3.81229350  | -0.16342030 |
| F  | -0.03990180 | 3.78379460  | -2.51668110 |
| F  | -0.02975920 | 1.11193910  | -2.52257300 |
| F  | -0.02861430 | 1.09205350  | 2.18581790  |
| C  | -0.03525690 | 3.83760760  | 2.28510560  |
| N  | -0.02455670 | 4.42610200  | 3.29887290  |
| F  | -0.04511360 | 5.13766350  | -0.17571370 |

## 43.

|    |             |             |             |
|----|-------------|-------------|-------------|
| N  | 0.31582510  | -3.52488280 | -0.00469630 |
| C  | 0.25964520  | -4.69405980 | -0.08711100 |
| O  | 0.23157430  | -5.98077220 | -0.17577080 |
| C  | -1.11490380 | -6.51748260 | -0.28361870 |
| H  | -1.59124430 | -6.12582390 | -1.18050200 |
| H  | -0.98713420 | -7.59259390 | -0.35167450 |
| H  | -1.68440410 | -6.24980110 | 0.60448930  |
| Si | 0.28595400  | -0.37177270 | -0.20696220 |
| F  | -0.91769980 | -0.82924220 | 0.70020730  |
| F  | 0.13409170  | -0.98114230 | -1.64755670 |
| F  | 1.64967150  | -0.82104280 | 0.43604900  |
| C  | 0.26660440  | 1.48182470  | -0.30767980 |

|   |             |            |             |
|---|-------------|------------|-------------|
| C | 0.13901780  | 2.22335160 | -1.48037360 |
| C | 0.38807500  | 2.20863380 | 0.87236760  |
| C | 0.12372020  | 3.61130050 | -1.45947330 |
| C | 0.38282670  | 3.59773590 | 0.96291400  |
| C | 0.25059700  | 4.27521960 | -0.24769540 |
| F | -0.00795420 | 4.31062110 | -2.58587480 |
| F | 0.01794960  | 1.61999940 | -2.66748300 |
| F | 0.50710870  | 1.53338900 | 2.03690630  |
| N | 0.58317970  | 4.27012510 | 2.15725290  |
| H | 0.32883920  | 3.73398040 | 2.97475100  |
| H | 0.20986850  | 5.20867470 | 2.17159310  |
| F | 0.22879180  | 5.61376030 | -0.23005860 |

#### 44.

|    |             |             |             |
|----|-------------|-------------|-------------|
| N  | -0.42934790 | -3.84713980 | -0.33353920 |
| C  | -0.28311710 | -5.00850150 | -0.41482260 |
| O  | -0.15599920 | -6.28858260 | -0.50667360 |
| C  | 1.22762400  | -6.73160660 | -0.44957890 |
| H  | 1.66094030  | -6.44514440 | 0.50684540  |
| H  | 1.18381620  | -7.81107880 | -0.54688880 |
| H  | 1.78447310  | -6.28986610 | -1.27381020 |
| Si | -0.19471490 | -0.73200230 | -0.49445620 |
| F  | -1.52552270 | -1.07233820 | 0.27173420  |
| F  | -0.23244200 | -1.31558650 | -1.95246040 |
| F  | 1.04874460  | -1.30034220 | 0.28596770  |
| C  | -0.03503800 | 1.11860040  | -0.57210370 |
| C  | 0.06005380  | 1.87116150  | -1.74040480 |
| C  | -0.00446650 | 1.82997520  | 0.62478310  |
| C  | 0.17348100  | 3.25490770  | -1.71664340 |
| C  | 0.10608700  | 3.21595440  | 0.71026570  |
| C  | 0.18842340  | 3.91555330  | -0.49450410 |
| F  | 0.26073240  | 3.94900810  | -2.84902260 |
| F  | 0.04591750  | 1.27858770  | -2.93686700 |
| F  | -0.08000290 | 1.14366330  | 1.77728480  |
| O  | 0.18545890  | 3.87610220  | 1.89262870  |
| C  | -1.08803400 | 4.00518300  | 2.54322570  |
| H  | -0.89910620 | 4.54654650  | 3.46654540  |
| H  | -1.77712790 | 4.57275460  | 1.91389380  |
| H  | -1.50800260 | 3.02341950  | 2.76743060  |
| F  | 0.28716960  | 5.24077180  | -0.47882950 |

#### 45.

|    |             |             |             |
|----|-------------|-------------|-------------|
| N  | 0.36897900  | -3.69408330 | 0.15345020  |
| C  | 0.30526590  | -4.86373570 | 0.22162980  |
| O  | 0.26803140  | -6.15090100 | 0.29645180  |
| C  | -1.08396090 | -6.68053860 | 0.36714940  |
| H  | -1.62544160 | -6.41393050 | -0.53862430 |
| H  | -0.96363380 | -7.75594020 | 0.44390670  |
| H  | -1.58431980 | -6.28201110 | 1.24778970  |
| Si | 0.27212970  | -0.56030830 | 0.34093850  |
| F  | 0.15031010  | -1.15897300 | 1.78916580  |
| F  | -0.93383690 | -1.04772990 | -0.54629780 |
| F  | 1.63959020  | -0.98034410 | -0.31345360 |
| C  | 0.21707860  | 1.29451730  | 0.42936290  |
| C  | 0.28623920  | 2.02326130  | -0.75558100 |
| C  | 0.11962950  | 2.04753990  | 1.59699230  |
| C  | 0.26161340  | 3.40848270  | -0.85780370 |
| C  | 0.09023240  | 3.43475810  | 1.57238020  |
| C  | 0.16396320  | 4.09110750  | 0.34959330  |
| F  | -0.00349810 | 4.13226370  | 2.70273940  |
| F  | 0.38605590  | 1.32757940  | -1.90641150 |

|            |             |             |             |
|------------|-------------|-------------|-------------|
| F          | 0.05038760  | 1.45282360  | 2.79024140  |
| C          | 0.35048120  | 4.10765840  | -2.17999160 |
| H          | 1.34463560  | 3.98250320  | -2.61293190 |
| H          | -0.36941270 | 3.68755270  | -2.88247050 |
| H          | 0.15438840  | 5.17152710  | -2.06689680 |
| F          | 0.13509270  | 5.42692060  | 0.35867160  |
| <b>46.</b> |             |             |             |
| N          | 0.31903380  | -3.10384320 | 0.00920590  |
| C          | 0.28280940  | -4.27664720 | 0.00981740  |
| O          | 0.27818210  | -5.56635920 | 0.01071380  |
| C          | -1.05949570 | -6.13547320 | 0.00818790  |
| H          | -1.58714450 | -5.81900330 | -0.88957650 |
| H          | -0.91021930 | -7.20987480 | 0.01024190  |
| H          | -1.59169490 | -5.81622410 | 0.90228220  |
| Si         | 0.27815100  | 0.03832510  | 0.01163270  |
| F          | -0.47545850 | -0.47207340 | 1.29289510  |
| F          | -0.46138420 | -0.46976020 | -1.27907060 |
| F          | 1.77465620  | -0.44687350 | 0.01953810  |
| C          | 0.26737830  | 1.89996860  | 0.01072190  |
| C          | 0.27983910  | 2.63846610  | -1.17168220 |
| C          | 0.28335500  | 2.64998290  | 1.18630780  |
| C          | 0.28021170  | 4.02698590  | -1.19319160 |
| C          | 0.28333910  | 4.03386050  | 1.22377390  |
| C          | 0.28019880  | 4.71000600  | 0.01596050  |
| F          | 0.28958610  | 4.68922320  | -2.34649780 |
| F          | 0.30159130  | 2.01122060  | -2.35077770 |
| F          | 0.30937150  | 2.00210140  | 2.36189760  |
| F          | 0.28361380  | 6.04280160  | -0.00382680 |
| H          | 0.29408000  | 4.57319020  | 2.16144640  |
| <b>47.</b> |             |             |             |
| N          | 0.27357480  | -3.66392800 | 0.29887390  |
| C          | 0.23955380  | -4.83649830 | 0.31260980  |
| O          | 0.23858750  | -6.12527550 | 0.32806510  |
| C          | -1.09752270 | -6.69948670 | 0.34923210  |
| H          | -0.94373140 | -7.77294990 | 0.37375250  |
| H          | -1.62318800 | -6.36223180 | 1.24055430  |
| H          | -1.63316370 | -6.40441340 | -0.55104100 |
| Si         | 0.24920200  | -0.59256660 | 0.39566040  |
| F          | 0.18454470  | -1.12753280 | 1.87016510  |
| F          | -1.01033820 | -1.06103830 | -0.42054740 |
| F          | 1.58069070  | -1.04072000 | -0.30736640 |
| C          | 0.23335750  | 1.27404510  | 0.43539530  |
| C          | 0.28346060  | 1.96011780  | -0.77778120 |
| C          | 0.17744450  | 2.05070980  | 1.58636400  |
| C          | 0.28075260  | 3.34759410  | -0.88714140 |
| C          | 0.17246780  | 3.43923340  | 1.53896230  |
| C          | 0.22439710  | 4.06905980  | 0.30616930  |
| F          | 0.11905480  | 4.15651160  | 2.65442730  |
| F          | 0.33615580  | 1.20798120  | -1.88396860 |
| F          | 0.12612200  | 1.48526430  | 2.79006930  |
| C          | 0.33102950  | 4.12449570  | -2.17814390 |
| F          | 0.38499110  | 3.34439140  | -3.25301380 |
| F          | -0.75206040 | 4.90532850  | -2.29907130 |
| F          | 1.40606760  | 4.92470640  | -2.20443390 |
| F          | 0.21854990  | 5.39720240  | 0.28220840  |
| <b>48.</b> |             |             |             |
| N          | -0.30826070 | -3.29594780 | -0.16801390 |
| C          | -0.24958820 | -4.46757410 | -0.16438150 |

|    |             |             |             |
|----|-------------|-------------|-------------|
| O  | -0.22307220 | -5.75596460 | -0.16103300 |
| C  | 1.12387080  | -6.30564920 | -0.15908200 |
| H  | 1.64667860  | -5.98052300 | 0.73825830  |
| H  | 0.99048740  | -7.38216640 | -0.16073330 |
| H  | 1.65025210  | -5.97828920 | -1.05353650 |
| Si | -0.32129000 | -0.23983100 | -0.15637740 |
| F  | -1.07911420 | -0.71938080 | 1.13077120  |
| F  | -1.07362810 | -0.70557380 | -1.45263160 |
| F  | 1.17302860  | -0.72956820 | -0.15717860 |
| C  | -0.29987550 | 1.63084620  | -0.14946610 |
| C  | -0.28354290 | 2.37147020  | -1.32976960 |
| C  | -0.28218500 | 2.36788730  | 1.03008070  |
| C  | -0.28353360 | 3.76142910  | -1.35067510 |
| C  | -0.28161950 | 3.76311720  | 1.06740270  |
| C  | -0.28570750 | 4.44924830  | -0.14765490 |
| F  | -0.27460250 | 4.42247360  | -2.50051580 |
| F  | -0.25970400 | 1.74943040  | -2.50755040 |
| F  | -0.25705770 | 1.72695080  | 2.20024590  |
| C  | -0.27165520 | 4.47569680  | 2.29943840  |
| N  | -0.26449200 | 5.06742170  | 3.31134070  |
| F  | -0.28538880 | 5.77449650  | -0.15893840 |

#### 49.

|    |            |            |            |
|----|------------|------------|------------|
| N  | -0.0671287 | -3.8418800 | -0.1981154 |
| C  | -0.0340181 | -5.0088982 | -0.2199380 |
| C  | 0.0066650  | -6.4644790 | -0.2455627 |
| H  | -0.4945305 | -6.8654827 | 0.6344276  |
| H  | 1.0402923  | -6.8080447 | -0.2516566 |
| H  | -0.4948722 | -6.8353764 | -1.1384822 |
| Si | -0.0270332 | -0.6660874 | -0.2417293 |
| F  | -0.8100737 | -1.1421964 | 1.0368132  |
| F  | -0.7594590 | -1.1802125 | -1.5341934 |
| F  | 1.4519729  | -1.2053494 | -0.2033151 |
| C  | 0.0083592  | 1.1913019  | -0.2662961 |
| C  | -0.0027739 | 1.9212451  | -1.4542779 |
| C  | 0.0631747  | 1.9328156  | 0.9101858  |
| C  | 0.0021949  | 3.3083502  | -1.4583032 |
| C  | 0.0714743  | 3.3247189  | 0.9754289  |
| C  | 0.0410994  | 3.9879899  | -0.2491788 |
| F  | -0.0214277 | 3.9909962  | -2.6020019 |
| F  | -0.0193094 | 1.2949581  | -2.6369761 |
| F  | 0.1033784  | 1.2890588  | 2.0952410  |
| N  | 0.1949893  | 4.0103414  | 2.1730893  |
| H  | -0.1250949 | 3.4868452  | 2.9755069  |
| H  | -0.1677793 | 4.9527219  | 2.1497279  |
| F  | 0.0399003  | 5.3266637  | -0.2503939 |

#### 50.

|    |            |            |            |
|----|------------|------------|------------|
| N  | -0.0215872 | -4.1687629 | -0.4968006 |
| C  | 0.0081722  | -5.3360385 | -0.4940826 |
| C  | 0.0453239  | -6.7919039 | -0.4898812 |
| H  | 1.0781375  | -7.1378020 | -0.4870862 |
| H  | -0.4553748 | -7.1793396 | -1.3761766 |
| H  | -0.4583820 | -7.1739434 | 0.3970849  |
| Si | 0.1361575  | -1.0091866 | -0.4881893 |
| F  | -0.6825313 | -1.4670458 | 0.7732045  |
| F  | -0.6007683 | -1.4678097 | -1.7985945 |
| F  | 1.5932608  | -1.6026273 | -0.4417055 |
| C  | 0.2504671  | 0.8478502  | -0.4890274 |
| C  | 0.3809337  | 1.5681147  | -1.6754388 |
| C  | 0.2384916  | 1.5958504  | 0.6865649  |

|   |            |           |            |
|---|------------|-----------|------------|
| C | 0.4625634  | 2.9525978 | -1.7005985 |
| C | 0.3182292  | 2.9878273 | 0.7215743  |
| C | 0.4224097  | 3.6517492 | -0.5007073 |
| F | 0.5792906  | 3.6087204 | -2.8524382 |
| F | 0.4405537  | 0.9257154 | -2.8464646 |
| F | 0.1581881  | 0.9643704 | 1.8661922  |
| O | 0.3526997  | 3.6858661 | 1.8847402  |
| C | -0.9490880 | 3.8530798 | 2.4660289  |
| H | -0.7988270 | 4.4156254 | 3.3839012  |
| H | -1.5955708 | 4.4145397 | 1.7876484  |
| H | -1.3965086 | 2.8839255 | 2.6936792  |
| F | 0.4937593  | 4.9786274 | -0.5234273 |

# 51.

|    |            |            |            |
|----|------------|------------|------------|
| N  | 0.0046583  | -4.0116619 | 0.3609747  |
| C  | 0.0196931  | -5.1792037 | 0.3621025  |
| C  | 0.0387393  | -6.6353638 | 0.3630901  |
| H  | -0.4681959 | -7.0134517 | 1.2498987  |
| H  | -0.4681933 | -7.0144403 | -0.5233061 |
| H  | 1.0672751  | -6.9938120 | 0.3633024  |
| Si | -0.0211148 | -0.8546796 | 0.3669240  |
| F  | -0.7622191 | -1.3667819 | 1.6554665  |
| F  | -0.7734609 | -1.3623483 | -0.9167036 |
| F  | 1.4722079  | -1.3540121 | 0.3594515  |
| C  | -0.0232606 | 1.0044197  | 0.3734727  |
| C  | -0.0091355 | 1.7542822  | -0.8014713 |
| C  | -0.0107123 | 1.7385538  | 1.5578651  |
| C  | -0.0208178 | 3.1433643  | -0.8673629 |
| C  | -0.0157504 | 3.1249899  | 1.5679440  |
| C  | -0.0200769 | 3.8034190  | 0.3556668  |
| F  | -0.0059856 | 3.7986089  | 2.7160192  |
| F  | 0.0236987  | 1.0952421  | -1.9744921 |
| F  | 0.0146592  | 1.1124073  | 2.7383899  |
| C  | -0.0102301 | 3.8793322  | -2.1724214 |
| H  | 0.9976984  | 3.9074703  | -2.5912735 |
| H  | -0.6557584 | 3.3811137  | -2.8943869 |
| H  | -0.3516668 | 4.9035171  | -2.0377539 |
| F  | -0.0220518 | 5.1390351  | 0.3886037  |

# 52.

|    |            |            |            |
|----|------------|------------|------------|
| N  | 0.0004055  | -3.3992711 | 0.0111120  |
| C  | 0.0099836  | -4.5667424 | 0.0110123  |
| C  | 0.0219221  | -6.0228040 | 0.0109576  |
| H  | -0.4869411 | -6.3985820 | 0.8976340  |
| H  | -0.4869349 | -6.3985462 | -0.8757340 |
| H  | 1.0487623  | -6.3860346 | 0.0109438  |
| Si | -0.0229282 | -0.2783295 | 0.0110172  |
| F  | -0.7720421 | -0.7807050 | 1.2977895  |
| F  | -0.7707187 | -0.7797908 | -1.2773504 |
| F  | 1.4712767  | -0.7732938 | 0.0109028  |
| C  | -0.0209225 | 1.5827900  | 0.0103776  |
| C  | -0.0057882 | 2.3208519  | -1.1720263 |
| C  | -0.0056681 | 2.3325879  | 1.1860139  |
| C  | -0.0056499 | 3.7092224  | -1.1932675 |
| C  | -0.0056109 | 3.7164587  | 1.2237909  |
| C  | -0.0073694 | 4.3923693  | 0.0158482  |
| F  | 0.0039954  | 4.3713526  | -2.3465452 |
| F  | 0.0177861  | 1.6934667  | -2.3510494 |
| F  | 0.0186451  | 1.6845181  | 2.3614580  |
| F  | -0.0047748 | 5.7251219  | -0.0046466 |
| H  | 0.0025720  | 4.2553597  | 2.1617614  |

53.

|    |            |            |            |
|----|------------|------------|------------|
| N  | -0.0062919 | -3.9578641 | 0.3128875  |
| C  | 0.0056482  | -5.1249582 | 0.3336199  |
| C  | 0.0203514  | -6.5807194 | 0.3606189  |
| H  | 0.5402812  | -6.9635360 | -0.5165495 |
| H  | 0.5316781  | -6.9302211 | 1.2565839  |
| H  | -0.9997327 | -6.9624980 | 0.3628999  |
| Si | -0.0227874 | -0.8893891 | 0.4052324  |
| F  | -0.0857537 | -1.4268337 | 1.8790817  |
| F  | -1.2837384 | -1.3502476 | -0.4120428 |
| F  | 1.3070686  | -1.3432721 | -0.2989888 |
| C  | -0.0290547 | 0.9767665  | 0.4479381  |
| C  | 0.0234639  | 1.6638079  | -0.7645316 |
| C  | -0.0813772 | 1.7521386  | 1.5998907  |
| C  | 0.0261290  | 3.0513317  | -0.8723561 |
| C  | -0.0817301 | 3.1406910  | 1.5539707  |
| C  | -0.0280738 | 3.7716342  | 0.3217762  |
| F  | -0.1323670 | 3.8569297  | 2.6701768  |
| F  | 0.0735937  | 0.9124774  | -1.8714029 |
| F  | -0.1335471 | 1.1852921  | 2.8028759  |
| C  | 0.0828784  | 3.8292495  | -2.1624851 |
| F  | 0.1319828  | 3.0498342  | -3.2381284 |
| F  | -0.9938301 | 4.6185610  | -2.2835083 |
| F  | 1.1643066  | 4.6210536  | -2.1868527 |
| F  | -0.0290979 | 5.0997720  | 0.2992938  |

54.

|    |            |            |            |
|----|------------|------------|------------|
| N  | -0.0092221 | -3.5883362 | -0.1724564 |
| C  | 0.0058474  | -4.7554976 | -0.1705352 |
| C  | 0.0249543  | -6.2114410 | -0.1689503 |
| H  | -0.4820609 | -6.5887422 | 0.7181337  |
| H  | -0.4820578 | -6.5902444 | -1.0554010 |
| H  | 1.0536805  | -6.5693082 | -0.1686260 |
| Si | -0.0282777 | -0.5429303 | -0.1627307 |
| F  | -0.7810897 | -1.0273047 | 1.1262315  |
| F  | -0.7801023 | -1.0172444 | -1.4567744 |
| F  | 1.4704121  | -1.0171739 | -0.1654900 |
| C  | -0.0223810 | 1.3274938  | -0.1582977 |
| C  | -0.0059590 | 2.0683940  | -1.3383801 |
| C  | -0.0060135 | 2.0643494  | 1.0212804  |
| C  | -0.0046982 | 3.4583800  | -1.3581531 |
| C  | -0.0043862 | 3.4594272  | 1.0599859  |
| C  | -0.0062860 | 4.1458794  | -0.1547781 |
| F  | 0.0054512  | 4.1201464  | -2.5076100 |
| F  | 0.0174881  | 1.4470104  | -2.5165531 |
| F  | 0.0177487  | 1.4234234  | 2.1914549  |
| C  | 0.0061254  | 4.1684255  | 2.2943026  |
| N  | 0.0142369  | 4.7542193  | 3.3096604  |
| F  | -0.0034102 | 5.4710743  | -0.1663132 |

55.

|    |             |             |             |
|----|-------------|-------------|-------------|
| N  | -0.06062510 | -4.95272560 | -0.24308310 |
| C  | -0.02037380 | -6.11693030 | -0.27447440 |
| H  | 0.01669800  | -7.18318510 | -0.30371700 |
| Si | -0.02825570 | -1.69492940 | -0.27758470 |
| F  | -0.80465390 | -2.18572280 | 0.99977540  |
| F  | -0.76219600 | -2.22043890 | -1.56502320 |
| F  | 1.44668180  | -2.24633960 | -0.24371870 |
| C  | 0.00587790  | 0.15961650  | -0.30043960 |
| C  | -0.00270070 | 0.88841500  | -1.48929430 |

|   |             |            |             |
|---|-------------|------------|-------------|
| C | 0.06049880  | 0.90051380 | 0.87661790  |
| C | 0.00596380  | 2.27537360 | -1.49368400 |
| C | 0.07240450  | 2.29240630 | 0.94098840  |
| C | 0.04588420  | 2.95496750 | -0.28442540 |
| F | -0.01457970 | 2.95748790 | -2.63731600 |
| F | -0.02027800 | 0.26048320 | -2.67094420 |
| F | 0.09736430  | 0.25593680 | 2.06111030  |
| N | 0.19687000  | 2.97873260 | 2.13744870  |
| H | -0.12523760 | 2.45895940 | 2.94145840  |
| H | -0.15809780 | 3.92403160 | 2.11221440  |
| F | 0.04875500  | 4.29334720 | -0.28590900 |

#### 56.

|    |             |             |             |
|----|-------------|-------------|-------------|
| N  | -0.01314710 | -5.21938330 | -0.57681840 |
| C  | 0.05693420  | -6.38250380 | -0.57345380 |
| H  | 0.12151570  | -7.44790630 | -0.57082980 |
| Si | 0.12879970  | -1.99098090 | -0.56151650 |
| F  | -0.69704300 | -2.46270310 | 0.69040500  |
| F  | -0.59796790 | -2.45939120 | -1.87446150 |
| F  | 1.58041410  | -2.59775600 | -0.50534000 |
| C  | 0.24508260  | -0.13698870 | -0.55793730 |
| C  | 0.37926340  | 0.58617320  | -1.74225150 |
| C  | 0.23496980  | 0.60628470  | 0.62076590  |
| C  | 0.46714760  | 1.97025180  | -1.76229720 |
| C  | 0.32182020  | 1.99755710  | 0.66050600  |
| C  | 0.42968000  | 2.66507350  | -0.55968680 |
| F  | 0.58796770  | 2.62970970  | -2.91136750 |
| F  | 0.43661690  | -0.05325670 | -2.91477410 |
| F  | 0.15065090  | -0.03014810 | 1.79724990  |
| O  | 0.36075740  | 2.69121440  | 1.82562210  |
| C  | -0.93984000 | 2.87003300  | 2.40667320  |
| H  | -0.78390480 | 3.43058420  | 3.32474660  |
| H  | -1.58122810 | 3.43807050  | 1.72902840  |
| H  | -1.39598480 | 1.90474310  | 2.63324710  |
| F  | 0.50749580  | 3.99132310  | -0.57750980 |

#### 57.

|    |             |             |             |
|----|-------------|-------------|-------------|
| N  | 0.05527310  | -5.08190810 | 0.27228670  |
| C  | 0.03527090  | -6.24139030 | 0.38657290  |
| H  | 0.01665220  | -7.30332390 | 0.49203840  |
| Si | 0.00574810  | -1.84613570 | 0.39524820  |
| F  | -0.08269770 | -2.45315220 | 1.84251830  |
| F  | -1.21894170 | -2.33810340 | -0.46255960 |
| F  | 1.34864770  | -2.29855920 | -0.28980520 |
| C  | -0.02901590 | 0.00606460  | 0.48366330  |
| C  | 0.04161720  | 0.73629340  | -0.70041260 |
| C  | -0.12035090 | 0.75615500  | 1.65391010  |
| C  | 0.02455270  | 2.12178530  | -0.79891570 |
| C  | -0.14049200 | 2.14336870  | 1.63250290  |
| C  | -0.06519510 | 2.80176130  | 0.41074870  |
| F  | -0.22839520 | 2.83847650  | 2.76423390  |
| F  | 0.13284370  | 0.04127590  | -1.85215240 |
| F  | -0.19361980 | 0.15781350  | 2.84473060  |
| C  | 0.10778520  | 2.82505160  | -2.11929950 |
| H  | 1.10267490  | 2.71027510  | -2.55330320 |
| H  | -0.60901050 | 2.40016810  | -2.82195130 |
| H  | -0.09770490 | 3.88685190  | -2.00315900 |
| F  | -0.08564170 | 4.13723190  | 0.42310450  |

#### 58.

|   |             |             |            |
|---|-------------|-------------|------------|
| N | -0.00086580 | -4.56658800 | 0.01217560 |
|---|-------------|-------------|------------|



|    |             |             |             |
|----|-------------|-------------|-------------|
| C  | 0.01262790  | -5.73171000 | 0.01140600  |
| H  | 0.02515450  | -6.79898490 | 0.01078370  |
| Si | -0.01713340 | -1.34380400 | 0.01394500  |
| F  | -0.77334010 | -1.86042620 | 1.29119490  |
| F  | -0.75282120 | -1.85880600 | -1.27631550 |
| F  | 1.47125870  | -1.85647030 | 0.02435900  |
| C  | -0.01431400 | 0.51429120  | 0.01315800  |
| C  | -0.00259510 | 1.25084140  | -1.17037390 |
| C  | 0.00227300  | 1.26383770  | 1.18906130  |
| C  | -0.00323080 | 2.63901960  | -1.19207580 |
| C  | 0.00051320  | 2.64746310  | 1.22574200  |
| C  | -0.00428370 | 3.32233290  | 0.01713330  |
| F  | 0.00427770  | 3.30085200  | -2.34505080 |
| F  | 0.01805910  | 0.62131530  | -2.34797750 |
| F  | 0.02931330  | 0.61494530  | 2.36371920  |
| F  | -0.00396490 | 4.65458370  | -0.00404510 |
| H  | 0.00907160  | 3.18730730  | 2.16316040  |

#### 59.

|    |             |             |             |
|----|-------------|-------------|-------------|
| N  | -0.00166470 | -5.04922480 | 0.36705650  |
| C  | 0.00582790  | -6.21388500 | 0.39425420  |
| H  | 0.01271490  | -7.28100920 | 0.41985120  |
| Si | -0.01774510 | -1.88256210 | 0.45347780  |
| F  | -0.08180610 | -2.43588910 | 1.92161460  |
| F  | -1.27310240 | -2.36004770 | -0.36318240 |
| F  | 1.30754630  | -2.35362690 | -0.24832920 |
| C  | -0.02421110 | -0.01973370 | 0.49763600  |
| C  | 0.02786010  | 0.66837130  | -0.71430410 |
| C  | -0.07685330 | 0.75302620  | 1.65151230  |
| C  | 0.02927330  | 2.05584870  | -0.81970270 |
| C  | -0.07843420 | 2.14146820  | 1.60747160  |
| C  | -0.02524050 | 2.77400360  | 0.37577030  |
| F  | -0.12953970 | 2.85597180  | 2.72425640  |
| F  | 0.07884640  | -0.08247370 | -1.82131300 |
| F  | -0.12816610 | 0.18273050  | 2.85260630  |
| C  | 0.08671030  | 2.83585690  | -2.10894480 |
| F  | 0.13090810  | 2.05737060  | -3.18533100 |
| F  | -0.98718230 | 3.62894350  | -2.22650460 |
| F  | 1.17115000  | 3.62312790  | -2.13329790 |
| F  | -0.02689160 | 4.10173300  | 0.35540240  |

#### 60.

|    |             |             |             |
|----|-------------|-------------|-------------|
| N  | -0.00535090 | -4.72087830 | -0.20666650 |
| C  | 0.01021340  | -5.88561850 | -0.19725120 |
| H  | 0.02468250  | -6.95295900 | -0.18854340 |
| Si | -0.02233720 | -1.58291700 | -0.19234560 |
| F  | -0.77584930 | -2.08686910 | 1.08883430  |
| F  | -0.76704190 | -2.06983730 | -1.48599220 |
| F  | 1.47046380  | -2.07564420 | -0.19259230 |
| C  | -0.01674510 | 0.28381930  | -0.18338210 |
| C  | -0.00196090 | 1.02409640  | -1.36396450 |
| C  | -0.00014550 | 1.01911600  | 0.99731610  |
| C  | -0.00054690 | 2.41378020  | -1.38360920 |
| C  | 0.00123300  | 2.41403390  | 1.03574480  |
| C  | -0.00152840 | 3.10027650  | -0.17944270 |
| F  | 0.00888580  | 3.07545510  | -2.53261080 |
| F  | 0.01967270  | 0.40136920  | -2.54116040 |
| F  | 0.02376990  | 0.37609060  | 2.16613430  |
| C  | 0.01179460  | 3.12527600  | 2.26889490  |
| N  | 0.01969640  | 3.71635660  | 3.28118450  |
| F  | 0.00109400  | 4.42505360  | -0.19054820 |

61.

|    |             |             |             |
|----|-------------|-------------|-------------|
| N  | -0.03449920 | -3.90714460 | -0.10266280 |
| C  | -0.01656260 | -5.07335850 | -0.16597840 |
| C  | 0.00572840  | -6.55072850 | -0.24490830 |
| F  | -0.60942270 | -7.07634700 | 0.80977360  |
| F  | -0.61239910 | -6.96203110 | -1.34722650 |
| F  | 1.25951890  | -6.99109800 | -0.26974590 |
| Si | -0.02415240 | -0.60260400 | -0.23363700 |
| F  | -1.24413330 | -1.07813810 | 0.64250150  |
| F  | -0.14992590 | -1.22112450 | -1.67365730 |
| F  | 1.31079460  | -1.10710780 | 0.43275510  |
| C  | -0.01245310 | 1.24582640  | -0.31981990 |
| C  | -0.11426070 | 1.99315380  | -1.49174180 |
| C  | 0.10586130  | 1.96360480  | 0.86637350  |
| C  | -0.10704640 | 3.38079670  | -1.46396830 |
| C  | 0.12206370  | 3.35208850  | 0.96300080  |
| C  | 0.01568320  | 4.03643590  | -0.24698460 |
| F  | -0.21323890 | 4.08705020  | -2.58766160 |
| F  | -0.23039080 | 1.39456490  | -2.68113130 |
| F  | 0.19930910  | 1.27861550  | 2.02724870  |
| N  | 0.31830060  | 4.01623070  | 2.16112300  |
| H  | 0.04787750  | 3.48387820  | 2.97578710  |
| H  | -0.03266590 | 4.96326100  | 2.17425920  |
| F  | 0.01601390  | 5.37417560  | -0.22369880 |

62.

|    |             |             |             |
|----|-------------|-------------|-------------|
| N  | -0.00532740 | -4.24132030 | -0.51417910 |
| C  | 0.01379920  | -5.40908450 | -0.50097260 |
| C  | 0.03766800  | -6.88868470 | -0.48353090 |
| F  | -0.57797270 | -7.34490590 | 0.60249380  |
| F  | -0.57919090 | -7.37106070 | -1.55738020 |
| F  | 1.29182990  | -7.32803700 | -0.47897010 |
| Si | 0.14822570  | -0.95791980 | -0.50476200 |
| F  | -0.67534410 | -1.44777160 | 0.74254960  |
| F  | -0.57283050 | -1.44153780 | -1.81612410 |
| F  | 1.59736480  | -1.57184150 | -0.44826460 |
| C  | 0.25328810  | 0.89377090  | -0.49748830 |
| C  | 0.37563300  | 1.62161190  | -1.68033400 |
| C  | 0.24183800  | 1.63185560  | 0.68462720  |
| C  | 0.45218560  | 3.00637470  | -1.69527200 |
| C  | 0.31786890  | 3.02346650  | 0.72915140  |
| C  | 0.41493250  | 3.69601910  | -0.48942470 |
| F  | 0.56132140  | 3.67126890  | -2.84186250 |
| F  | 0.43130760  | 0.98572230  | -2.85460340 |
| F  | 0.16620980  | 0.98866200  | 1.85767520  |
| O  | 0.35571220  | 3.71155840  | 1.89710530  |
| C  | -0.94712870 | 3.89585360  | 2.47228720  |
| H  | -0.79195520 | 4.44389020  | 3.39795450  |
| H  | -1.57864550 | 4.47763160  | 1.79707310  |
| H  | -1.41327400 | 2.93199930  | 2.68470780  |
| F  | 0.48248440  | 5.02247890  | -0.50245640 |

63.

|    |            |            |            |
|----|------------|------------|------------|
| N  | -0.5354870 | -4.1091763 | 0.0000000  |
| C  | -0.4864462 | -5.2762050 | 0.0000000  |
| C  | -0.4214770 | -6.7545364 | 0.0000000  |
| Si | -0.3714627 | -0.8069797 | 0.0000000  |
| F  | -1.1458163 | -1.2908627 | -1.2830658 |
| F  | 1.0706118  | -1.4331623 | 0.0000000  |
| F  | -1.1458163 | -1.2908627 | 1.2830658  |

|   |            |            |            |
|---|------------|------------|------------|
| C | -0.2855790 | 1.0438506  | 0.0000000  |
| C | 0.8825945  | 1.8064389  | 0.0000000  |
| C | -1.4825356 | 1.7554319  | 0.0000000  |
| C | 0.9139805  | 3.1975130  | 0.0000000  |
| C | -1.5257785 | 3.1402618  | 0.0000000  |
| C | -0.3226998 | 3.8336654  | 0.0000000  |
| F | -2.6850184 | 3.7919855  | 0.0000000  |
| F | 2.0618629  | 1.1625979  | 0.0000000  |
| F | -2.6424060 | 1.0872704  | 0.0000000  |
| C | 2.1820248  | 3.9965985  | 0.0000000  |
| H | 2.2295467  | 4.6399084  | 0.8798142  |
| H | 3.0479324  | 3.3394419  | 0.0000000  |
| H | 2.2295467  | 4.6399084  | -0.8798142 |
| F | -0.3643710 | 5.1682257  | 0.0000000  |
| F | -1.6469320 | -7.2688906 | 0.0000000  |
| F | 0.2218628  | -7.1862113 | -1.0800013 |
| F | 0.2218628  | -7.1862113 | 1.0800013  |

#### 64.

|    |             |             |             |
|----|-------------|-------------|-------------|
| N  | -0.00839010 | -3.48731300 | 0.00824350  |
| C  | 0.00529480  | -4.65520110 | 0.00938870  |
| C  | 0.02192630  | -6.13501270 | 0.01038750  |
| F  | -0.59650720 | -6.60180010 | -1.06936210 |
| F  | 1.27407520  | -6.58042290 | 0.01073640  |
| F  | -0.59651840 | -6.60050060 | 1.09077210  |
| Si | -0.02016050 | -0.20710160 | 0.01262010  |
| F  | -0.77911310 | -0.73674020 | 1.28369670  |
| F  | -0.74862020 | -0.73359680 | -1.27770230 |
| F  | 1.46360590  | -0.73488720 | 0.02840020  |
| C  | -0.01735690 | 1.64792200  | 0.01206650  |
| C  | -0.00778220 | 2.38339710  | -1.17236350 |
| C  | -0.00035920 | 2.39682420  | 1.18848820  |
| C  | -0.00862770 | 3.77129050  | -1.19461230 |
| C  | -0.00310700 | 3.78025380  | 1.22428250  |
| C  | -0.00911240 | 4.45436860  | 0.01494750  |
| F  | -0.00230090 | 4.43254500  | -2.34733630 |
| F  | 0.01036020  | 1.75256700  | -2.34892730 |
| F  | 0.02742980  | 1.74655730  | 2.36217920  |
| F  | -0.01000450 | 5.78596170  | -0.00721290 |
| H  | 0.00526840  | 4.32088890  | 2.16130740  |

#### 65.

|    |             |             |             |
|----|-------------|-------------|-------------|
| N  | -0.04041180 | -4.05404300 | 0.32955840  |
| F  | -1.21616730 | -7.19028340 | 0.38026440  |
| C  | -0.01611060 | -5.22138200 | 0.34832610  |
| C  | 0.01924110  | -6.70123310 | 0.37191900  |
| F  | 0.65332450  | -7.16117080 | -0.70132830 |
| F  | 0.65429110  | -7.12694580 | 1.45874290  |
| Si | -0.01692290 | -0.82618680 | 0.39865390  |
| F  | -0.09450720 | -1.38922250 | 1.86308130  |
| F  | -1.26177010 | -1.31612560 | -0.42748030 |
| F  | 1.30875750  | -1.31921010 | -0.28894990 |
| C  | -0.02052530 | 1.03339020  | 0.44109280  |
| C  | 0.03071070  | 1.72085200  | -0.77128600 |
| C  | -0.07435710 | 1.80518000  | 1.59578510  |
| C  | 0.02945590  | 3.10815660  | -0.87623480 |
| C  | -0.07692290 | 3.19340410  | 1.55166580  |
| C  | -0.02607760 | 3.82589970  | 0.31957890  |
| F  | -0.12931580 | 3.90762580  | 2.66797590  |
| F  | 0.08330940  | 0.96850780  | -1.87718380 |
| F  | -0.12629860 | 1.23339500  | 2.79582680  |

|            |             |             |             |
|------------|-------------|-------------|-------------|
| C          | 0.07721680  | 3.88889210  | -2.16584290 |
| F          | 0.13788700  | 3.11040040  | -3.24137350 |
| F          | -1.01071190 | 4.66220380  | -2.28540250 |
| F          | 1.14744140  | 4.69475610  | -2.18719480 |
| F          | -0.03153630 | 5.15313940  | 0.29980520  |
| <b>66.</b> |             |             |             |
| N          | -0.01436610 | -3.68507020 | -0.17766070 |
| C          | 0.00259450  | -4.85264200 | -0.17424980 |
| C          | 0.02531630  | -6.33324500 | -0.16919850 |
| F          | -0.59115730 | -6.79706350 | 0.91238180  |
| F          | 1.27944790  | -6.77183490 | -0.16771510 |
| F          | -0.59100800 | -6.80468580 | -1.24773200 |
| Si         | -0.02695410 | -0.47081480 | -0.16775260 |
| F          | -0.78109430 | -0.99063520 | 1.10728190  |
| F          | -0.76544180 | -0.97200770 | -1.46009480 |
| F          | 1.46055320  | -0.98073440 | -0.16515870 |
| C          | -0.02138600 | 1.39230670  | -0.15743760 |
| C          | -0.00787990 | 2.13291870  | -1.33795270 |
| C          | -0.00443300 | 2.12525870  | 1.02482850  |
| C          | -0.00632260 | 3.52240820  | -1.35573510 |
| C          | -0.00332530 | 3.51986090  | 1.06461880  |
| C          | -0.00666910 | 4.20704660  | -0.15018270 |
| F          | 0.00240960  | 4.18537250  | -2.50339680 |
| F          | 0.01212820  | 1.51006660  | -2.51484330 |
| F          | 0.01982140  | 1.47925950  | 2.19177760  |
| C          | 0.00716730  | 4.23063540  | 2.29811470  |
| N          | 0.01473780  | 4.82228260  | 3.31008620  |
| F          | -0.00413860 | 5.53131710  | -0.15997930 |
| <b>67.</b> |             |             |             |
| N          | -0.04164150 | -4.54787770 | -0.11980670 |
| C          | -0.02293670 | -5.71988320 | -0.19160240 |
| C          | -0.00088600 | -7.09569650 | -0.27441260 |
| N          | 0.01777020  | -8.26842950 | -0.34389360 |
| Si         | -0.01626900 | -1.24357770 | -0.25502320 |
| F          | -1.22809760 | -1.71954160 | 0.63261510  |
| F          | -0.15630510 | -1.86656280 | -1.69222870 |
| F          | 1.32305510  | -1.75398440 | 0.39882360  |
| C          | -0.00394670 | 0.60357250  | -0.34285890 |
| C          | -0.10538760 | 1.34963390  | -1.51563300 |
| C          | 0.10994390  | 1.32186200  | 0.84348830  |
| C          | -0.10401420 | 2.73725180  | -1.48818230 |
| C          | 0.12003990  | 2.71036260  | 0.93968330  |
| C          | 0.01315870  | 3.39365790  | -0.27099400 |
| F          | -0.21017870 | 3.44264710  | -2.61219450 |
| F          | -0.21616410 | 0.74966350  | -2.70472990 |
| F          | 0.20456010  | 0.63695640  | 2.00432390  |
| N          | 0.31096070  | 3.37571920  | 2.13767350  |
| H          | 0.04339650  | 2.84195140  | 2.95235270  |
| H          | -0.04449810 | 4.32108980  | 2.15063400  |
| F          | 0.00744030  | 4.73118500  | -0.24803450 |
| <b>68.</b> |             |             |             |
| N          | -0.00149650 | -4.87082150 | -0.55384650 |
| C          | 0.01988710  | -6.04486170 | -0.54402620 |
| C          | 0.04479100  | -7.42309640 | -0.53135980 |
| N          | 0.06555610  | -8.59781230 | -0.51994840 |
| Si         | 0.15025100  | -1.57187890 | -0.54148650 |
| F          | -0.67801540 | -2.06404890 | 0.70217880  |
| F          | -0.56497000 | -2.06112660 | -1.85422500 |

|   |             |             |             |
|---|-------------|-------------|-------------|
| F | 1.59735000  | -2.19062070 | -0.47800870 |
| C | 0.25597190  | 0.27858390  | -0.53655580 |
| C | 0.37976930  | 1.00521690  | -1.72006890 |
| C | 0.24383230  | 1.01713730  | 0.64530850  |
| C | 0.45685660  | 2.38990240  | -1.73596760 |
| C | 0.32100600  | 2.40860920  | 0.68869700  |
| C | 0.41895070  | 3.08016350  | -0.53047020 |
| F | 0.56718800  | 3.05401320  | -2.88269120 |
| F | 0.43619990  | 0.36798930  | -2.89348530 |
| F | 0.16621220  | 0.37413540  | 1.81825240  |
| O | 0.35881770  | 3.09726540  | 1.85609930  |
| C | -0.94545680 | 3.29284100  | 2.42461460  |
| H | -0.79069300 | 3.84217220  | 3.34956450  |
| H | -1.56951940 | 3.87717680  | 1.74483940  |
| H | -1.41920890 | 2.33264010  | 2.63689150  |
| F | 0.48672040  | 4.40642020  | -0.54430590 |

69.

|    |            |            |            |
|----|------------|------------|------------|
| N  | 0.5139411  | -4.7562066 | 0.0000000  |
| C  | 0.4429566  | -5.9284002 | 0.0000000  |
| C  | 0.3578157  | -7.3043939 | 0.0000000  |
| N  | 0.2837210  | -8.4769710 | 0.0000000  |
| Si | 0.3954165  | -1.4401514 | 0.0000000  |
| F  | -1.0533253 | -2.0516666 | 0.0000000  |
| F  | 1.1630847  | -1.9385453 | -1.2818614 |
| F  | 1.1630847  | -1.9385453 | 1.2818614  |
| C  | 0.3319472  | 0.4108391  | 0.0000000  |
| C  | 1.5373437  | 1.1083991  | 0.0000000  |
| C  | -0.8277385 | 1.1865855  | 0.0000000  |
| C  | 1.5962682  | 2.4927331  | 0.0000000  |
| C  | -0.8430763 | 2.5778383  | 0.0000000  |
| C  | 0.4009201  | 3.1995045  | 0.0000000  |
| F  | 2.7620236  | 3.1324046  | 0.0000000  |
| F  | 2.6889134  | 0.4259658  | 0.0000000  |
| F  | -2.0142088 | 0.5563415  | 0.0000000  |
| F  | 0.4577799  | 4.5332729  | 0.0000000  |
| C  | -2.1012488 | 3.3925138  | 0.0000000  |
| H  | -2.1400913 | 4.0360598  | 0.8801782  |
| H  | -2.9754361 | 2.7463625  | 0.0000000  |
| H  | -2.1400913 | 4.0360598  | -0.8801782 |

70.

|    |            |            |            |
|----|------------|------------|------------|
| N  | 0.3112442  | -4.1591477 | 0.0000000  |
| C  | 0.3245513  | -5.3333876 | 0.0000000  |
| Si | 0.0232061  | -0.8640578 | 0.0000000  |
| F  | -1.3959950 | -1.5396743 | 0.0000000  |
| F  | 0.8141140  | -1.3200224 | -1.2827376 |
| F  | 0.8141140  | -1.3200224 | 1.2827376  |
| C  | -0.1313840 | 0.9827099  | 0.0000000  |
| C  | 1.0358228  | 1.7447153  | 0.0000000  |
| C  | -1.3252446 | 1.7023258  | 0.0000000  |
| C  | 1.0350785  | 3.1313760  | 0.0000000  |
| C  | -1.3843549 | 3.0862730  | 0.0000000  |
| C  | -0.1905433 | 3.7870554  | 0.0000000  |
| F  | 2.1735783  | 3.8161365  | 0.0000000  |
| F  | 2.2189463  | 1.1204941  | 0.0000000  |
| F  | -2.4881182 | 1.0362543  | 0.0000000  |
| F  | -0.1994176 | 5.1187574  | 0.0000000  |
| H  | -2.3316674 | 3.6087834  | 0.0000000  |
| C  | 0.3407577  | -6.7118604 | 0.0000000  |
| N  | 0.3553119  | -7.8867086 | 0.0000000  |

71.

|    |            |            |            |
|----|------------|------------|------------|
| Si | 0.2262462  | -1.5121037 | 0.0000000  |
| F  | 0.9359415  | -2.0780604 | -1.2847629 |
| F  | 0.9359415  | -2.0780604 | 1.2847629  |
| F  | -1.2829165 | -1.9449709 | 0.0000000  |
| C  | 0.3824208  | 0.3410701  | 0.0000000  |
| C  | 1.6618767  | 0.8852333  | 0.0000000  |
| C  | -0.6828427 | 1.2412231  | 0.0000000  |
| C  | 1.8939753  | 2.2515118  | 0.0000000  |
| C  | -0.5097432 | 2.6248748  | 0.0000000  |
| C  | 0.8005896  | 3.1042849  | 0.0000000  |
| N  | -0.0454879 | -4.7777191 | 0.0000000  |
| C  | -0.2981993 | -5.9243749 | 0.0000000  |
| F  | 3.1269705  | 2.7383031  | 0.0000000  |
| F  | 2.7187337  | 0.0704831  | 0.0000000  |
| F  | -1.9179681 | 0.7382985  | 0.0000000  |
| C  | -0.5949983 | -7.2706276 | 0.0000000  |
| N  | -0.8477129 | -8.4181047 | 0.0000000  |
| C  | -1.6243940 | 3.6428726  | 0.0000000  |
| F  | 1.0314730  | 4.4111782  | 0.0000000  |
| F  | -2.8338762 | 3.0929031  | 0.0000000  |
| F  | -1.5380149 | 4.4308926  | 1.0804350  |
| F  | -1.5380149 | 4.4308926  | -1.0804350 |

72.

|    |            |            |            |
|----|------------|------------|------------|
| Si | 0.1163620  | -1.1260500 | 0.0000000  |
| F  | -1.3654834 | -1.6430493 | 0.0000000  |
| F  | 0.8622498  | -1.6394262 | -1.2853346 |
| F  | 0.8622498  | -1.6394262 | 1.2853346  |
| C  | 0.1444863  | 0.7344442  | 0.0000000  |
| C  | 1.3806196  | 1.3770051  | 0.0000000  |
| C  | -0.9758379 | 1.5576792  | 0.0000000  |
| C  | 1.5183559  | 2.7582633  | 0.0000000  |
| C  | -0.8954777 | 2.9518610  | 0.0000000  |
| C  | 0.3709963  | 3.5381343  | 0.0000000  |
| N  | 0.0771947  | -4.3709919 | 0.0000000  |
| C  | -0.0375519 | -5.5394198 | 0.0000000  |
| F  | 2.7164446  | 3.3241689  | 0.0000000  |
| F  | 2.4939407  | 0.6419554  | 0.0000000  |
| F  | -2.1937270 | 1.0178274  | 0.0000000  |
| C  | -0.1740512 | -6.9111651 | 0.0000000  |
| N  | -0.2916555 | -8.0802571 | 0.0000000  |
| F  | 0.4872663  | 4.8572171  | 0.0000000  |
| C  | -2.0667919 | 3.7612464  | 0.0000000  |
| N  | -3.0295894 | 4.4299833  | 0.0000000  |

## Cartesian coordinates of the selected CSD structures

AHESIR

|    |             |            |             |
|----|-------------|------------|-------------|
| Si | 1.69200000  | 4.48700000 | 0.57500000  |
| F  | 2.37200000  | 3.07100000 | 0.80300000  |
| F  | 1.88200000  | 5.11300000 | 2.00700000  |
| F  | 2.69100000  | 5.14000000 | -0.44300000 |
| C  | -0.92600000 | 5.01100000 | -0.35900000 |
| C  | 0.00100000  | 4.01800000 | -0.01100000 |
| C  | -0.39500000 | 2.70300000 | -0.14500000 |
| H  | 0.21600000  | 2.01200000 | 0.08600000  |
| C  | -1.67300000 | 2.35100000 | -0.61200000 |

|    |             |            |             |
|----|-------------|------------|-------------|
| C  | -2.55900000 | 3.36800000 | -0.94900000 |
| H  | -3.42500000 | 3.14700000 | -1.27000000 |
| C  | -2.19800000 | 4.69400000 | -0.82500000 |
| H  | -2.81200000 | 5.38300000 | -1.05500000 |
| Si | 1.51800000  | 1.97600000 | 4.36800000  |
| F  | 2.19800000  | 3.39200000 | 4.59700000  |
| F  | 1.70800000  | 1.34900000 | 5.80000000  |
| F  | 2.51700000  | 1.32200000 | 3.35000000  |
| C  | -1.10000000 | 1.45100000 | 3.43500000  |
| C  | -0.17300000 | 2.44400000 | 3.78200000  |
| C  | -0.56900000 | 3.76000000 | 3.64900000  |
| H  | 0.04200000  | 4.45000000 | 3.88000000  |
| C  | -1.84700000 | 4.11100000 | 3.18100000  |
| C  | -2.73300000 | 3.09400000 | 2.84400000  |
| H  | -3.59900000 | 3.31500000 | 2.52300000  |
| C  | -2.37200000 | 1.76800000 | 2.96800000  |
| H  | -2.98600000 | 1.07900000 | 2.73800000  |
| H  | -0.83718663 | 0.41868120 | 3.53573250  |
| H  | -0.66338353 | 6.04330219 | -0.25758615 |
| H  | -2.14418666 | 5.13480094 | 3.08928450  |
| H  | -1.97018666 | 1.32719906 | -0.70371550 |

# WIZHUI01

|    |             |             |             |
|----|-------------|-------------|-------------|
| C  | 0.73700000  | 12.25900000 | 13.66100000 |
| C  | 0.03300000  | 13.29800000 | 14.23600000 |
| H  | -0.73100000 | 13.62000000 | 13.81600000 |
| C  | 1.90900000  | 11.77700000 | 14.30000000 |
| C  | 1.55500000  | 13.38500000 | 16.07800000 |
| H  | 1.80800000  | 13.75800000 | 16.89100000 |
| C  | 0.44100000  | 13.87000000 | 15.42500000 |
| H  | -0.03500000 | 14.58300000 | 15.78600000 |
| Si | 2.93500000  | 10.37900000 | 13.59800000 |
| F  | 4.43800000  | 10.73900000 | 13.57500000 |
| F  | 2.55200000  | 10.01100000 | 12.14900000 |
| C  | 2.30500000  | 12.34600000 | 15.53700000 |
| F  | 2.74400000  | 9.10400000  | 14.45600000 |
| Si | 5.14500000  | 6.58900000  | 11.78300000 |
| F  | 4.69100000  | 7.05500000  | 10.37700000 |
| F  | 5.05500000  | 7.84600000  | 12.70000000 |
| C  | 4.61500000  | 4.62300000  | 13.72800000 |
| C  | 3.03600000  | 4.63900000  | 11.86800000 |
| C  | 3.89000000  | 3.59600000  | 14.30500000 |
| H  | 4.15600000  | 3.25400000  | 15.12900000 |
| C  | 4.19200000  | 5.17600000  | 12.49200000 |
| C  | 2.36700000  | 3.58900000  | 12.47500000 |
| H  | 1.62000000  | 3.22600000  | 12.05800000 |
| C  | 2.78000000  | 3.07100000  | 13.67800000 |
| H  | 2.31300000  | 2.36800000  | 14.06700000 |
| F  | 6.65400000  | 6.26200000  | 11.62000000 |
| H  | 3.16802479  | 11.98581197 | 16.05695461 |
| H  | 0.36598385  | 11.83579854 | 12.75097388 |
| H  | 2.66423696  | 5.03078105  | 10.94431182 |
| H  | 5.49808148  | 4.98119771  | 14.21458144 |
